# Supplementary material for: Phylogenetic analysis and development of molecular markers for five medicinal Alpinia species based on complete plastome sequences
Source: PubMed Central journal article supplement (PMC8456601; doi:10.1186/s12870-021-03204-1), 2021-09-22
Supplement: 12870_2021_3204_MOESM1_ESM.pdf [file 12870_2021_3204_MOESM1_ESM.pdf]

1 **TITLE**

2

3 Phylogenetic analysis and development of molecular markers for five medicinal  
4 *Alpinia* species based on complete plastome sequences

5

6 **AUTHOR LIST**

7 Heyu Yang<sup>1,3#</sup>, Liqiang Wang<sup>2,3#</sup>, Haimei Chen<sup>3</sup>, Mei Jiang<sup>3</sup>, Wuwei Wu<sup>4</sup>, Shengyu Liu<sup>5</sup>, Jiehua  
8 Wang<sup>1\*</sup> and Chang Liu<sup>3\*</sup>

9

10 <sup>1</sup>School of Environmental Science and Engineering, Tianjin University, Tianjin

300072, China.

11

12 <sup>2</sup>College of Pharmacy, Heze University, Heze 274015, Shandong Province, P.R. China.

13

14 <sup>3</sup>Institute of Medicinal Plant Development, Chinese Academy of Medical Sciences and Peking Union

15

16 Medical College, Beijing 100193, PR China.

17

18 <sup>4</sup>Guangxi Botanical Garden of Medicinal Plants, Nanning, Guangxi 530023, China.

19

20 <sup>5</sup>Institute of Medical Information & Library, Chinese Academy of Medical Sciences & Peking Union

21

22 Medical College, Beijing 100193, china.

23

24 \*Correspondence: Chang Liu: cliu6688@yahoo.com ; Tel: +86-10-57833111; Fax: +86-10-

25

26 62899715; Jiehua Wang: jiehuawang@tju.edu.cn

27

28 #Heyu Yang and Liqiang Wang contributed equally to this work.

29

30 E-mails:

31

32 HYY: 18700944808@163.com

33

34 LW: lys832000@163.com

35

36 HC: hmchen@implad.ac.cn

37

38 MJ: mjiang0502@163.com

39

40 WW: wuweiwu2013@163.com

41

42 SYL: shengyuliu558@163.com

43

44 JHW: jiehuawang@tju.edu.cn

45

46 CL: cliu6688@yahoo.com

30 **Supplementary tables**

31 **Table S1. Base composition in the plastomes of the four *Alpinia* species.**

32 **Table S2. List of genes annotated in the plastome of *A. galanga*. Numbers in parentheses**  
33 **represented the repetition of genes. Superscript T: trans-splicing gene.**

34 **Table S3. List of genes annotated in the plastome of *A. nigra*. Numbers in parentheses**  
35 **represented the copy number of genes. Superscript T: trans-splicing gene.**

36 **Table S4. List of genes annotated in the plastome of *A. officinarum*. Numbers in parentheses**  
37 **represented the repetition of genes. Superscript T: trans-splicing gene.**

38 **Table S5. List of genes annotated in the plastome of *A. oxyphylla*. Numbers in parentheses**  
39 **represented the repetition of genes. Superscript T: trans-splicing gene.**

40 **Table S6. The length of introns and exons for the splitting genes in the plastome of *A. galanga*.**  
41 **The gene *rps12* was a trans-splicing gene.**

42 **Table S7. The length of introns and exons for the splitting genes in the plastome of *A. nigra*.**  
43 **The gene *rps12* was a trans-splicing gene.**

44 **Table S8. The length of introns and exons for the splitting genes in the plastome of *A.***  
45 ***officinarum*. The gene *rps12* was a trans-splicing gene.**

46 **Table S9. The length of introns and exons for the splitting genes in the plastome of *A.***  
47 ***oxyphylla*. The gene *rps12* was a trans-splicing gene.**

48 **Table S10. SSR identified in the plastome of *A. galanga*. P1 = Mononucleotide; P2 = Di**  
49 **nucleotide; P3 = Tri nucleotide; P4 = Tetra nucleotide; P5 = Penta nucleotide; 6 = Hexa**  
50 **nucleotide repeats and c = Compound repeat microsatellites.**

51 **Table S11. SSR identified in the plastome of *A. nigra*. P1 = Mononucleotide; P2 = Di nucleotide;**  
52 **P3 = Tri nucleotide; P4 = Tetra nucleotide; P5 = Penta nucleotide; 6 = Hexa nucleotide repeats**  
53 **and c = Compound repeat microsatellites.**

54 **Table S12. SSR identified in the plastome of *A. officinarum*. P1 = Mononucleotide; P2 = Di**  
55 **nucleotide; P3 = Tri nucleotide; P4 = Tetra nucleotide; P5 = Penta nucleotide; 6 = Hexa**  
56 **nucleotide repeats and c = Compound repeat microsatellites.**

57 **Table S13. SSR identified in the plastome of *A. oxyphylla*. P1 = Mononucleotide; P2 = Di**  
58 **nucleotide; P3 = Tri nucleotide; P4 = Tetra nucleotide; P5 = Penta nucleotide; 6 = Hexa**  
59 **nucleotide repeats and c = Compound repeat microsatellites.**

60 **Table S14. Comparison of SSR markers found among four *Alpinia* species and one outgroup**  
61 **species of *Zingiber spectabile*. Zisp: *Zingiber spectabile*; Alga: *Alpinia galanga*; Alni: *Alpinia***  
62 ***nigra*; Aloh: *Alpinia officinarum*; Alox: *Alpinia oxyphylla*.**

63 **Table S15. Dispersed repeat sequences in the plastome of *A. galanga*.**

64 **Table S16. Dispersed repeat sequences in the plastome of *A. nigra*.**

65 **Table S17. Dispersed repeat sequences in the plastome of *A. officinarum*.**

66 **Table S18. Dispersed repeat sequences in the plastome of *A. oxyphylla*.**

67 **Table S19. Tandem repeat sequences identified in the plastome of *A. galanga*. a: coding**  
68 **sequences; b: intergenic spacers.**

69 **Table S20. Tandem repeat sequences identified in the plastome of *A. nigra*. a: coding**  
70 **sequences; b: intergenic spacers.**

71 **Table S21. Tandem repeat sequences identified in the plastome of *A. officinarum*. a: coding**  
72 **sequences; b: intergenic spacers.**

73 **Table S22. Tandem repeat sequences identified in the plastome of *A. oxyphylla*. a: coding**  
74 **sequences; b: intergenic spacers.**

75 **Table S23. The distances among the shared intergenic spacer (IGS) regions from the five**  
76 ***Alpinia* plastomes. Alga: *Alpinia galanga*; Alha: *Alpinia hainanensis*; Alni: *Alpinia nigra*; Aloh:**  
77 ***Alpinia officinarum*; Alox: *Alpinia oxyphylla*.**

78 **Table S24. The list of accession numbers of the plastome sequences used in the phylogenetic**  
79 **analyses of the Zingiberaceae.**

80 **Table S25. The dN, dS, and dN/dS ( $\omega$ ) value of 77 common protein-coding genes from**  
81 **plastomes of 21 *Alpinia* species.**

82 **Table S26. The two pairs of primers for the amplification of DNA barcodes.**

83 **Table S27. The list of sample numbers of the samples used in the species discrimination**  
84 **analyses of the *Alpinia*.**

85

86 **Figure S1. Schematic representation of the *A. nigra* plastome features.**

87 **Figure S2. Schematic representation of the *A. officinarum* plastome features.**

88 **Figure S3. Schematic representation of the *A. oxyphylla* plastome features.**

89 **Figure S4. The schematic diagram of position and length of introns and exons for the splitting**

90 **genes in the plastome of *A. galanga*. The gene *rps12* was a trans-splicing gene.**

91 **Figure S5. The schematic diagram of position and length of introns and exons for the splitting**

92 **genes in the plastome of *A. nigra*. The gene *rps12* was a trans-splicing gene.**

93 **Figure S6. The schematic diagram of position and length of introns and exons for the splitting**

94 **genes in the plastome of *A. officinarum*. The gene *rps12* was a trans-splicing gene.**

95 **Figure S7. The schematic diagram of position and length of introns and exons for the splitting**

96 **genes in the plastome of *A. oxyphylla*. The gene *rps12* was a trans-splicing gene.**

97 **Figure S8. The VCF output for the *A. officinarum*.**

98 **Figure S9. The VCF output for the *A. oxyphylla*.**

99 **Figure S10. The VCF output for the *A. oxyphylla*.**

100 **Figure S11. The VCF output for the *A. nigra*.**

101 **Figure S12. The original and full-length gel electrophoresis results of the amplification of DNA**

102 **barcodes using designed primers.**

103 **Figure S13. The alignment of amplicons produced by designed Alpp primers.**

104 **Figure S14. The alignment of amplicons produced by designed Alpr primers.**

105 **Figure S15. The alignment of amplicons in 10 *Alpinia* plastomes produced by designed Alpp**

106 **primers in silico.**

107 **Figure S16. The alignment of amplicons in 10 *Alpinia* plastomes produced by designed Alpp**

108 **primers in silico.**

109 **Figure S1. Schematic representation of the *A. nigra* plastome features.**  
 110 From the center going outward, the first circle shows the species name and specific information  
 111 regarding the genome (length, GC content, and the number of genes). The optional GC content is  
 112 depicted as the proportion of the shaded parts of each section and the length of the corresponding  
 113 single short copy (SSC), inverted repeat (IRa and IRb), and large single-copy (LSC) regions are also  
 114 given in this circle. The outer circle shows the gene names and their optional codon usage bias. The  
 115 genes are colored based on their functional categories. Genes inside and outside of the circle are  
 116 transcribed in clockwise and counterclockwise directions, represented with arrows. The optional  
 117 shaded area stretching from the inner sphere toward the outer circle marks the IR regions.

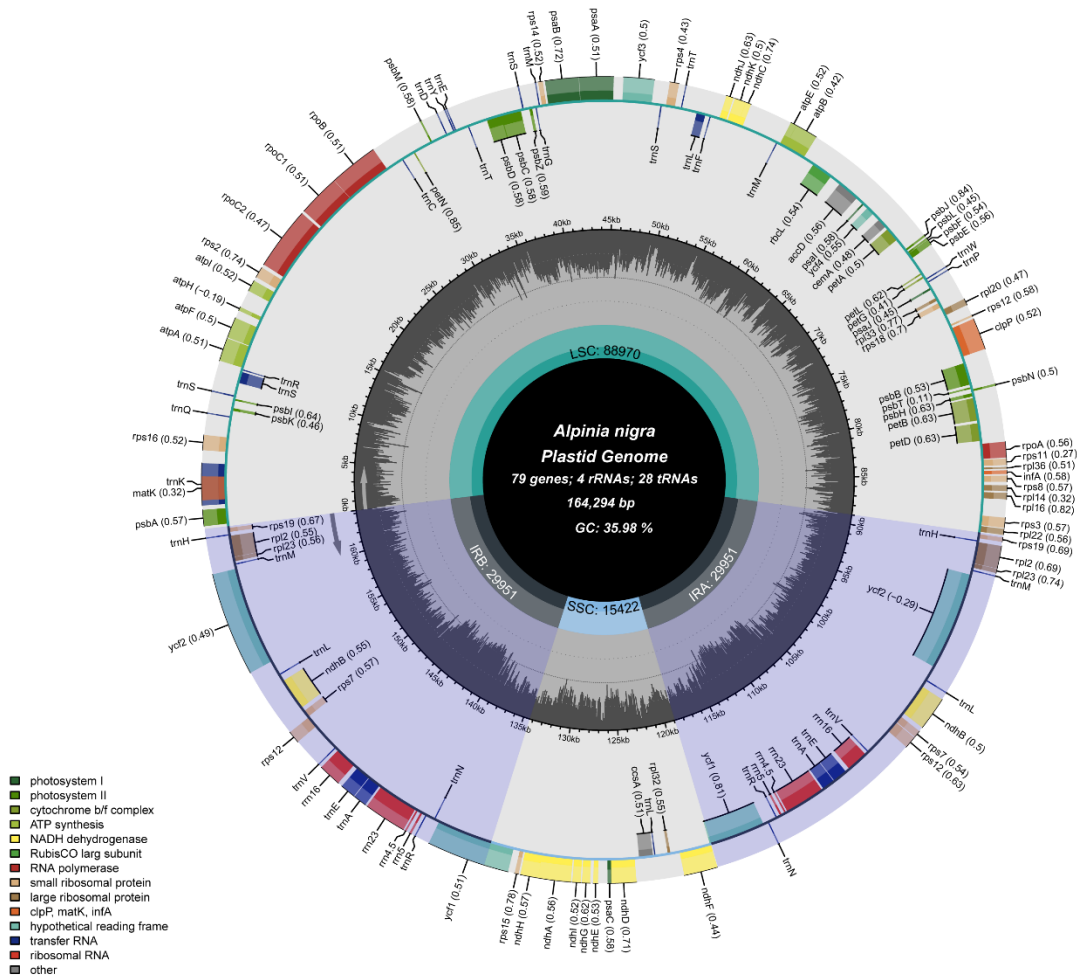

119 **Figure S2. Schematic representation of the *A. officinarum* plastome features.**  
 120 From the center going outward, the first circle shows the species name and specific information  
 121 regarding the genome (length, GC content, and the number of genes). The optional GC content is  
 122 depicted as the proportion of the shaded parts of each section and the length of the corresponding  
 123 single short copy (SSC), inverted repeat (IRa and IRb), and large single-copy (LSC) regions are also  
 124 given in this circle. The outer circle shows the gene names and their optional codon usage bias. The  
 125 genes are colored based on their functional categories. Genes inside and outside of the circle are  
 126 transcribed in clockwise and counterclockwise directions, represented with arrows. The optional  
 127 shaded area stretching from the inner sphere toward the outer circle marks the IR regions.

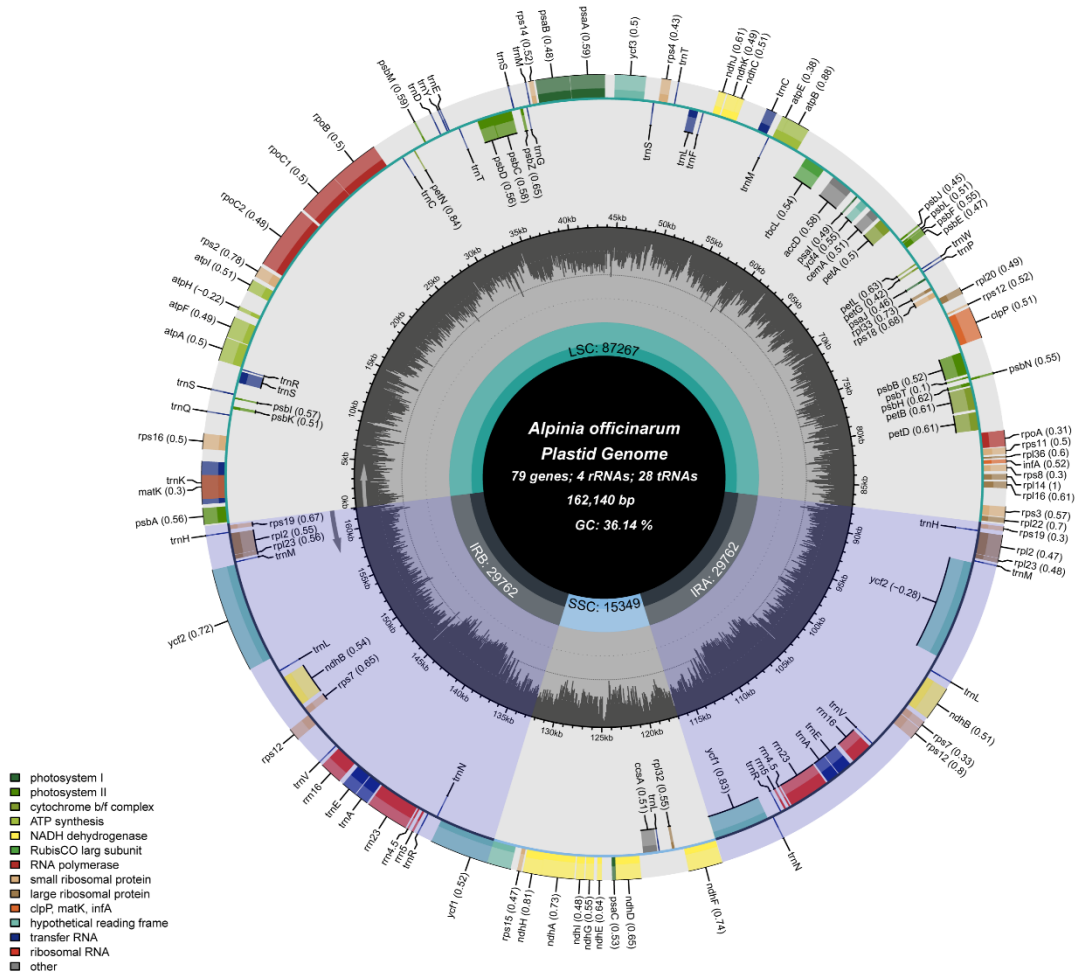

129 **Figure S3. Schematic representation of the *A. oxyphylla* plastome features.**  
 130 From the center going outward, the first circle shows the species name and specific information  
 131 regarding the genome (length, GC content, and the number of genes). The optional GC content is  
 132 depicted as the proportion of the shaded parts of each section and the length of the corresponding  
 133 single short copy (SSC), inverted repeat (IRa and IRb), and large single-copy (LSC) regions are also  
 134 given in this circle. The outer circle shows the gene names and their optional codon usage bias. The  
 135 genes are colored based on their functional categories. Genes inside and outside of the circle are  
 136 transcribed in clockwise and counterclockwise directions, represented with arrows. The optional  
 137 shaded area stretching from the inner sphere toward the outer circle marks the IR regions.

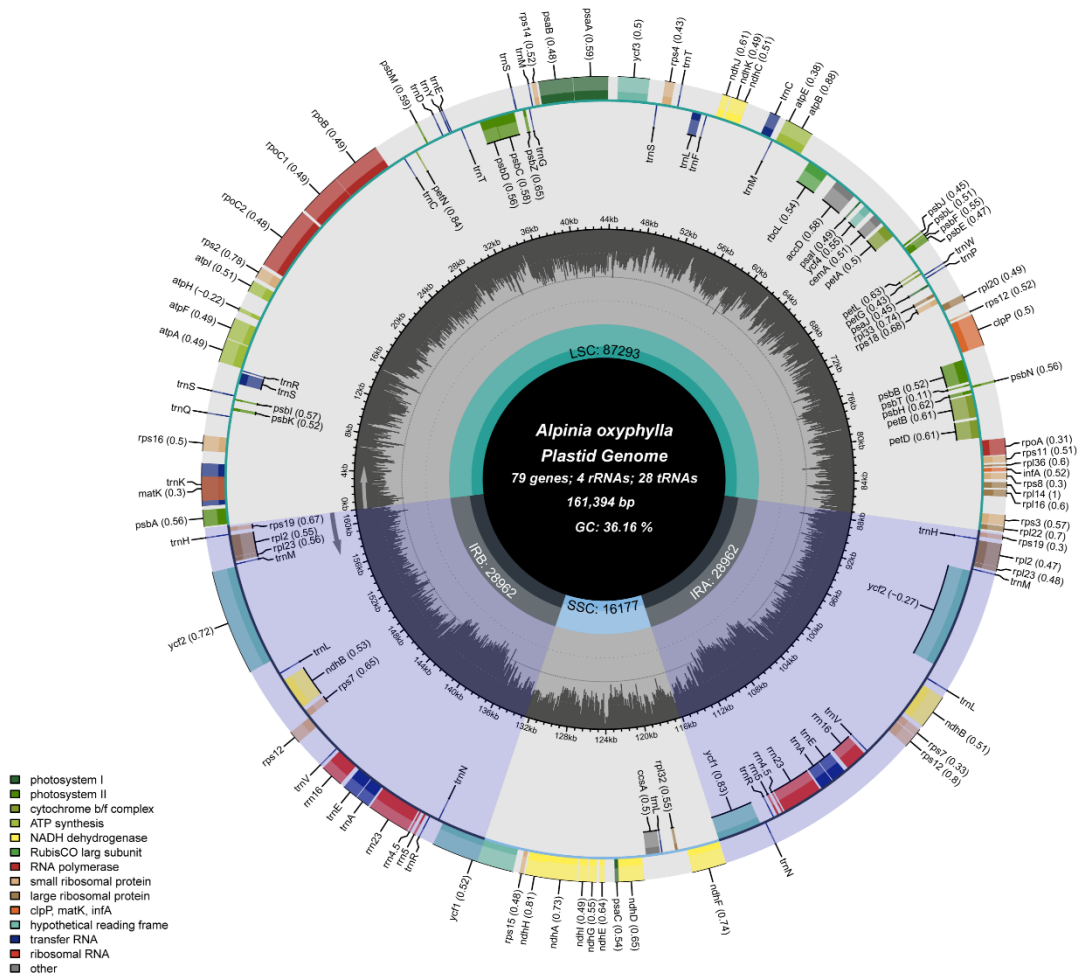

139 **Figure S4. The schematic diagram of position and length of introns and exons for**  
 140 **the splitting genes in the plastome of *A. galanga*. The gene *rps12* was a trans-**  
 141 **splicing gene.**

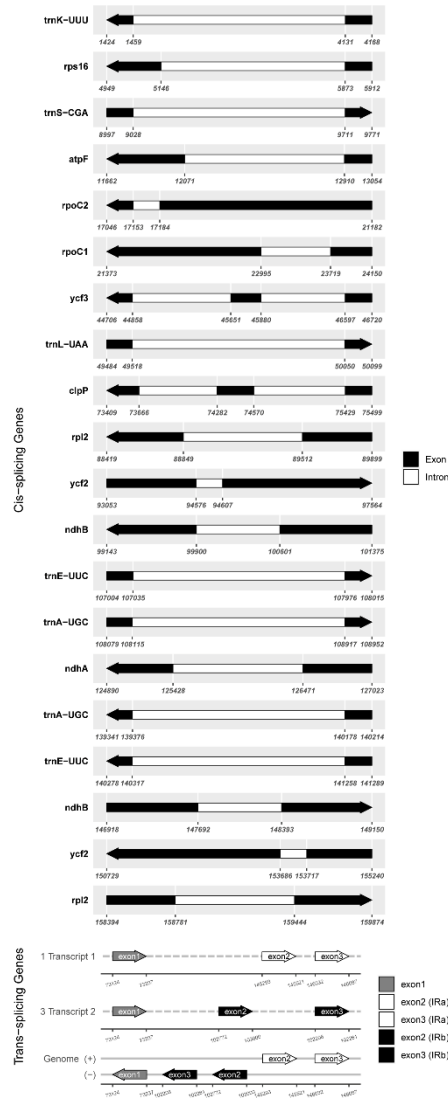

142



143 **FigureS5. The schematic diagram of position and length of introns and exons for**  
 144 **the splitting genes in the plastome of *A. nigra*. The gene *rps12* was a trans-**  
 145 **splicing gene.**

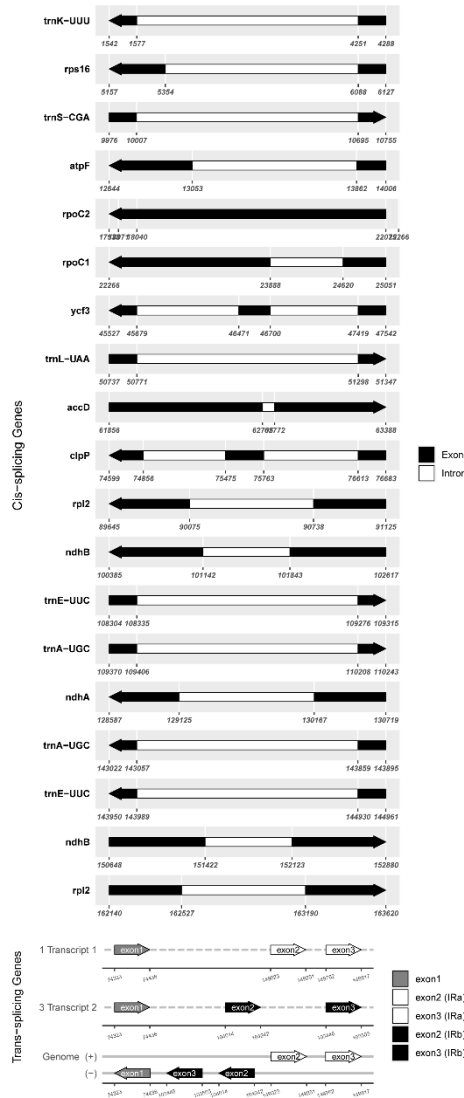

146

147 **Figure S6. The schematic diagram of position and length of introns and exons**  
 148 **for the splitting genes in the plastome of *A. officinarum*. The gene *rps12* was a**  
 149 **trans-splicing gene.**

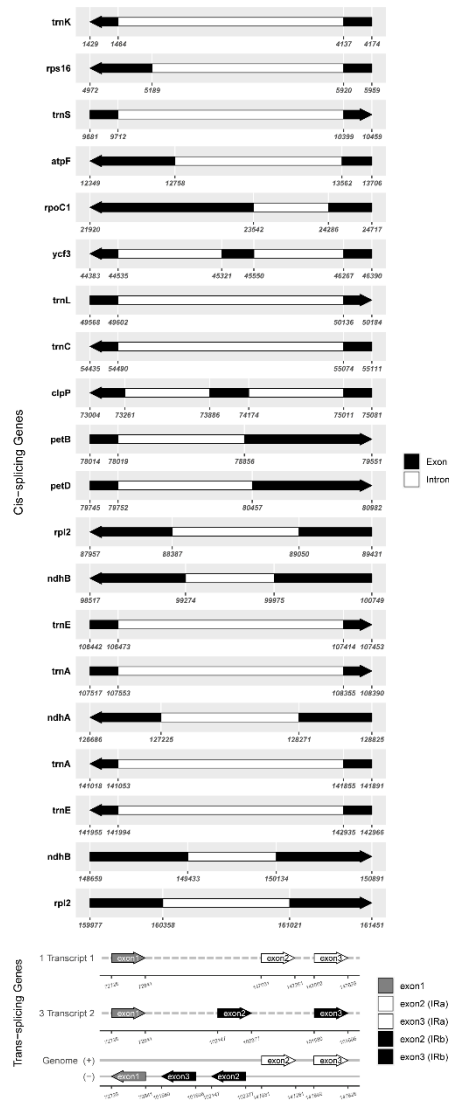

150

151 **FigureS7. The schematic diagram of position and length of introns and exons for**  
 152 **the splitting genes in the plastome of *A. oxyphylla*. The gene *rps12* was a trans-**  
 153 **splicing gene.**

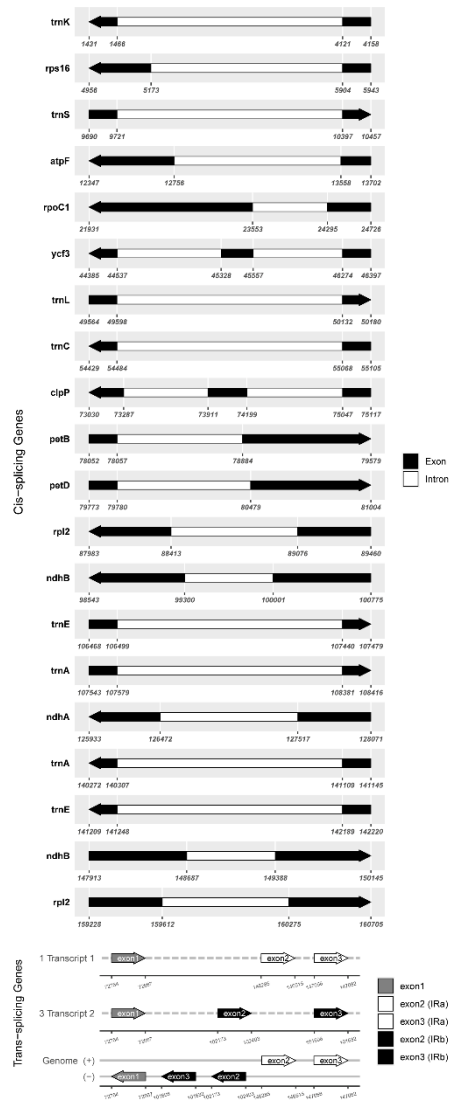

154

155 **Figure S8. The VCF output for the *A. officinarum*.**

156 The VCF file with all the detected intra-individual polymorphism outputed by the heteroplasmy mode  
157 of NOVOPLasty. The allele frequency (AF), depth of coverage (DP) are given as additional info. FR  
158 indicates if the polymorphism was detected on the forward and/or reverse strand. LCR will indicate if  
159 the polymorphism is situated near a low-complexity region; SNR stands for single nucleotide repeat.

```
160 ##fileformat=VCFv4.0
161 ##fileDate=20210531
162 ##reference=/home/zhangh/my_apps/HybPiper-master/MK940823.fasta
163 ##INFO=<ID=AF,Number=1,Type=Float,Description="Allele Frequency">
164 ##INFO=<ID=DP,Number=1,Type=Integer,Description="Raw Depth">
165 ##INFO=<ID=FR,Number=1,Type=Flag,Description="Detected on the forward(F) and/or reverse(R) strand">
166 ##INFO=<ID=LCR,Number=1,Type=String,Description="Low Complexity Region">
167 #CHROM POS ID REF ALT QUALFILTER INFO
168 cp 87674 . A . . AF=;DP=129;FR=R;LCR=SNR
169 cp 87680 . A . . AF=;DP=125;FR=R;LCR=SNR
170
```

171 **Figure S9. The VCF output for the *A. oxyphylla*.**

172 The VCF file with all the detected intra-individual polymorphism outputed by the heteroplasmy mode  
173 of NOVOPLasty. The allele frequency (AF), depth of coverage (DP) are given as additional info. FR  
174 indicates if the polymorphism was detected on the forward and/or reverse strand. LCR will indicate if  
175 the polymorphism is situated near a low-complexity region; SNR stands for single nucleotide repeat.

```
176 ##fileformat=VCFv4.0
177 ##fileDate=14:13:3606
178 ##reference=/home/zhangh/my_apps/HybPiper-master/MK940824.fasta
179 ##INFO=<ID=AF,Number=1,Type=Float,Description="Allele Frequency">
180 ##INFO=<ID=DP,Number=1,Type=Integer,Description="Raw Depth">
181 ##INFO=<ID=FR,Number=1,Type=Flag,Description="Detected on the forward(F) and/or reverse(R) strand">
182 ##INFO=<ID=LCR,Number=1,Type=String,Description="Low Complexity Region">
183 #CHROM POS ID REF ALT QUALFILTER INFO
184 cp 89024 . T G . . AF=0.949;DP=39;FR=R;LCR=SNR
185 cp 89039 . T A,C . . AF=0.976;DP=41;FR=R;LCR=
186 cp 89040 . A G,T . . AF=0.976;DP=41;FR=R;LCR=
187 cp 89195 . T A . . AF=0.0511;DP=39;FR=R;LCR=
188 cp 89197 . C A . . AF=0.0511;DP=39;FR=R;LCR=
189 cp 89327 . T G . . AF=0.0447;DP=44;FR=R;LCR=
190 cp 89457 . A C . . AF=0.0761;DP=39;FR=R;LCR=
191 cp 89630 . A C . . AF=0.0403;DP=49;FR=R;LCR=
192 cp 90064 . A T . . AF=0.0447;DP=44;FR=R;LCR=
193 cp 90409 . CAATTATA C . . AF=0.0364;DP=55;FR=R;LCR=
194 cp 90494 . G T . . AF=0.048;DP=41;FR=R;LCR=
195 cp 90510 . T A . . AF=0.0505;DP=39;FR=R;LCR=
196 cp 90524 . A G,T . . AF=0.952;DP=41;FR=R;LCR=
197 cp 90525 .
198 A,C . . AF=0.977;DP=43;FR=R;LCR=
199 cp 91306 .
200 C,A . . AF=0.965;DP=56;FR=R;LCR=
201 cp 92629 . G T . . AF=0.0322;DP=62;FR=R;LCR=
202 cp 93100 . T A . . AF=0.0214;DP=46;FR=R;LCR=
203 cp 93468 . T A . . AF=0.0286;DP=35;FR=R;LCR=
204 cp 93769 . C A . . AF=0.0176;DP=56;FR=R;LCR=
205 cp 93821 . G T . . AF=0.0169;DP=59;FR=R;LCR=
206 cp 93848 . A C . . AF=0.0327;DP=61;FR=R;LCR=
207 cp 93894 . A T . . AF=0.0605;DP=49;FR=R;LCR=
208 cp 94060 . C T . . AF=0.0214;DP=46;FR=R;LCR=
209 cp 94062 . C T . . AF=0.0429;DP=46;FR=R;LCR=
210 cp 94884 . G T . . AF=0.0196;DP=51;FR=F;LCR=
211 cp 96369 . T G . . AF=0.0435;DP=46;FR=F;LCR=
212 cp 96467 . A T . . AF=0.0351;DP=57;FR=F;LCR=
```

```

213 cp 96534 . T A . . AF=0.0358;DP=55;FR=F;LCR=
214 cp 97616 . G A . . AF=0.0402;DP=49;FR=R;LCR=
215 cp 97916 . C A . . AF=0.0428;DP=92;FR=FR;LCR=
216 cp 98809 . A C . . AF=0.0455;DP=44;FR=R;LCR=
217 cp 98951 . A C . . AF=0.0521;DP=38;FR=R;LCR=
218 cp 100787 . C A . . AF=0.0306;DP=65;FR=F;LCR=
219 cp 100914 . A C . . AF=0.0278;DP=36;FR=F;LCR=
220 cp 101043 . G T . . AF=0.0182;DP=54;FR=F;LCR=
221 cp 101153 . G T . . AF=0.0217;DP=46;FR=R;LCR=
222 cp 101570 . C A . . AF=0.0698;DP=43;FR=F;LCR=
223 cp 101632 . G T . . AF=0.0836;DP=47;FR=F;LCR=
224 cp 101633 . A T . . AF=0.0627;DP=47;FR=F;LCR=
225 cp 101634 . A T . . AF=0.0627;DP=47;FR=F;LCR=
226 cp 101657 . A C . . AF=0.0393;DP=50;FR=F;LCR=
227 cp 101775 . C A . . AF=0.0359;DP=55;FR=F;LCR=
228 cp 102204 . T G . . AF=0.0378;DP=52;FR=F;LCR=
229 cp 102454 .
230 C,T . . AF=0.898;DP=58;FR=F;LCR=
231 cp 102794 . T C . . AF=0.0408;DP=49;FR=F;LCR=
232 cp 102797 . A G . . AF=0.0408;DP=49;FR=F;LCR=
233 cp 102849 . C T . . AF=0.042;DP=47;FR=F;LCR=
234 cp 102870 . A T . . AF=0.044;DP=45;FR=F;LCR=
235 cp 103038 . A G . . AF=0.054;DP=37;FR=F;LCR=
236 cp 103221 . G T . . AF=0.0465;DP=43;FR=F;LCR=
237 cp 103385 . G A . . AF=0.0371;DP=53;FR=F;LCR=
238 cp 103401 . C T . . AF=0.0364;DP=54;FR=F;LCR=
239 cp 103533 . C A . . AF=0.0457;DP=43;FR=F;LCR=
240 cp 103963 . C T . . AF=0.0435;DP=46;FR=F;LCR=
241 cp 104003 . C A . . AF=0.0427;DP=46;FR=F;LCR=
242 cp 104432 . A C . . AF=0.0702;DP=28;FR=F;LCR=
243 cp 104713 . T G . . AF=0.0488;DP=41;FR=F;LCR=
244 cp 104762 . G T . . AF=0.0393;DP=50;FR=F;LCR=
245 cp 105233 . A T . . AF=0.127;DP=55;FR=F;LCR=
246

```

247 **Figure S10. The VCF output for the *A. galanga*.**

248 The VCF file with all the detected intra-individual polymorphism outputed by the heteroplasmy mode  
249 of NOVOPLasty. The allele frequency (AF), depth of coverage (DP) are given as additional info. FR  
250 indicates if the polymorphism was detected on the forward and/or reverse strand. LCR will indicate if  
251 the polymorphism is situated near a low-complexity region; SNR stands for single nucleotide repeat.

```

252 ##fileformat=VCFv4.0
253 ##fileDate=11:36:2106
254 ##reference=/home/zhangh/my_apps/HybPiper-master/NC_035895.fasta
255 ##INFO=<ID=AF,Number=1,Type=Float,Description="Allele Frequency">
256 ##INFO=<ID=DP,Number=1,Type=Integer,Description="Raw Depth">
257 ##INFO=<ID=FR,Number=1,Type=Flag,Description="Detected on the forward(F) and/or reverse(R) strand">
258 ##INFO=<ID=LCR,Number=1,Type=String,Description="Low Complexity Region">
259 #CHROM POS ID REF ALT QUALFILTER INFO
260 cp 229 . T A . . AF=0.0111;DP=90;FR=R;LCR=
261 cp 234 . A C . . AF=0.0404;DP=74;FR=R;LCR=
262

```

263 **Figure S11. The VCF output for the *A. nigra*.**

264 The VCF file with all the detected intra-individual polymorphism outputed by the heteroplasmy mode  
265 of NOVOPLasty. The allele frequency (AF), depth of coverage (DP) are given as additional info. FR  
266 indicates if the polymorphism was detected on the forward and/or reverse strand. LCR will indicate if  
267 the polymorphism is situated near a low-complexity region; SNR stands for single nucleotide repeat.

```

268 ##fileformat=VCFv4.0
269 ##fileDate=19:46:5906
270 ##reference=/home/zhangh/my_apps/HybPiper-master/MK940825.fasta

```

```

271 ##INFO=<ID=AF,Number=1,Type=Float,Description="Allele Frequency">
272 ##INFO=<ID=DP,Number=1,Type=Integer,Description="Raw Depth">
273 ##INFO=<ID=FR,Number=1,Type=Flag,Description="Detected on the forward(F) and/or reverse(R) strand">
274 ##INFO=<ID=LCR,Number=1,Type=String,Description="Low Complexity Region">
275 #CHROM POS ID REF ALT QUALFILTER INFO
276 cp 89413 . A T . . AF=0.0184;DP=162;FR=R;LCR=SNR
277 cp 89452 .
278 C,A . . AF=0.988,;DP=162;FR=R;LCR=SNR
279 cp 89783 . C A . . AF=0.0311;DP=224;FR=R;LCR=SNR(T)
280 cp 89832 . G T . . AF=0.0135;DP=148;FR=R;LCR=
281 cp 89833 . G T . . AF=0.0128;DP=156;FR=R;LCR=
282 cp 89900 . A C . . AF=0.0185;DP=108;FR=R;LCR=
283 cp 89990 . C A . . AF=0.0167;DP=119;FR=R;LCR=
284 cp 90217 . C A . . AF=0.0129;DP=232;FR=R;LCR=
285 cp 90316 . T A . . AF=0.0133;DP=224;FR=R;LCR=
286 cp 90780 . C A . . AF=0.0173;DP=115;FR=R;LCR=
287 cp 90833 . C A . . AF=0.0185;DP=108;FR=R;LCR=
288 cp 91245 . C T . . AF=0.0217;DP=92;FR=R;LCR=
289 cp 91535 . C A . . AF=0.0156;DP=192;FR=R;LCR=
290 cp 92306 . C A . . AF=0.016;DP=124;FR=R;LCR=
291 cp 92564 . G T . . AF=0.0153;DP=130;FR=R;LCR=
292 cp 92743 . C A . . AF=0.0159;DP=126;FR=R;LCR=
293 cp 92819 . C A . . AF=0.0181;DP=110;FR=R;LCR=
294 cp 92859 . A G . . AF=0.0165;DP=120;FR=R;LCR=
295 cp 93059 . A G . . AF=0.0133;DP=150;FR=R;LCR=
296 cp 93379 . C A . . AF=0.0176;DP=113;FR=R;LCR=
297 cp 93769 . G T . . AF=0.0181;DP=110;FR=R;LCR=
298 cp 94088 . G T . . AF=0.0174;DP=114;FR=R;LCR=SNR
299 cp 94187 . G A . . AF=0.0159;DP=126;FR=R;LCR=
300 cp 94368 . G T . . AF=0.0115;DP=260;FR=R;LCR=
301 cp 94439 . C A . . AF=0.0146;DP=273;FR=R;LCR=
302 cp 94608 . C A . . AF=0.0167;DP=119;FR=R;LCR=SNR
303 cp 95000 . C A . . AF=0.0129;DP=155;FR=R;LCR=
304 cp 95112 .
305 . . AF=;DP=126;FR=R;LCR=
306 cp 96101 . C A . . AF=0.016;DP=124;FR=R;LCR=
307 cp 96495 . G C,T . . AF=0.0177,;DP=112;FR=R;LCR=
308 cp 96569 . C A . . AF=0.0157;DP=127;FR=R;LCR=
309 cp 96609 . G T . . AF=0.0156;DP=128;FR=R;LCR=
310 cp 96675 . G T . . AF=0.0164;DP=122;FR=R;LCR=
311 cp 96876 . G A . . AF=0.0155;DP=257;FR=R;LCR=
312 cp 96943 . C A . . AF=0.016;DP=125;FR=R;LCR=
313 cp 97234 . G T . . AF=0.0179;DP=111;FR=R;LCR=
314 cp 97385 . G T . . AF=0.0138;DP=289;FR=R;LCR=
315 cp 97880 . G T . . AF=0.0182;DP=110;FR=R;LCR=
316 cp 98283 . G T . . AF=0.0141;DP=142;FR=R;LCR=
317 cp 98365 . G T . . AF=0.0158;DP=126;FR=R;LCR=
318 cp 98384 . G T,C . . AF=0.0165,;DP=121;FR=R;LCR=
319 cp 98881 . G T . . AF=0.0186;DP=107;FR=R;LCR=
320 cp 98912 . G T . . AF=0.0192;DP=104;FR=R;LCR=
321 cp 99236 . G T . . AF=0.0178;DP=112;FR=R;LCR=
322 cp 99380 . C A . . AF=0.015;DP=133;FR=R;LCR=
323 cp 99693 . G T . . AF=0.017;DP=117;FR=R;LCR=
324 cp 99698 . C A . . AF=0.0183;DP=109;FR=R;LCR=
325 cp 99927 . G T . . AF=0.0152;DP=131;FR=R;LCR=
326 cp 100269 . A G . . AF=0.0113;DP=266;FR=R;LCR=
327 cp 100705 . G T . . AF=0.017;DP=117;FR=R;LCR=
328 cp 100788 . C A . . AF=0.01;DP=298;FR=R;LCR=
329 cp 100859 . C A . . AF=0.0158;DP=126;FR=R;LCR=
330 cp 101082 . T A,C . . AF=0.987,;DP=152;FR=R;LCR=

```

|     |    |        |   |                |     |   |   |                                 |
|-----|----|--------|---|----------------|-----|---|---|---------------------------------|
| 331 | cp | 101367 | . | C              | A   | . | . | AF=0.0234;DP=128;FR=R;LCR=      |
| 332 | cp | 101491 | . | C              | A   | . | . | AF=0.0185;DP=108;FR=R;LCR=      |
| 333 | cp | 101718 | . | G              | T   | . | . | AF=0.0155;DP=128;FR=R;LCR=      |
| 334 | cp | 101778 | . | C              | A   | . | . | AF=0.0152;DP=131;FR=R;LCR=      |
| 335 | cp | 102454 | . | G              | A   | . | . | AF=0.0125;DP=240;FR=R;LCR=      |
| 336 | cp | 102710 | . | G              | T   | . | . | AF=0.0129;DP=155;FR=R;LCR=      |
| 337 | cp | 103144 | . | T              | C   | . | . | AF=0.0175;DP=114;FR=R;LCR=      |
| 338 | cp | 103270 | . | C              | A   | . | . | AF=0.0156;DP=128;FR=R;LCR=      |
| 339 | cp | 103433 | . | A              | C   | . | . | AF=0.0155;DP=128;FR=R;LCR=      |
| 340 | cp | 103505 | . | C              | A   | . | . | AF=0.0308;DP=97;FR=R;LCR=SNR(T) |
| 341 | cp | 103686 | . | CATATTGTAGGGTC | .   | . | . | AF=0.0487;DP=308;FR=R;LCR=      |
| 342 | cp | 103993 | . | G              | T   | . | . | AF=0.0113;DP=176;FR=R;LCR=      |
| 343 | cp | 104347 | . | T              | G   | . | . | AF=0.0465;DP=129;FR=R;LCR=      |
| 344 | cp | 104484 | . | G              | T   | . | . | AF=0.0177;DP=112;FR=R;LCR=      |
| 345 | cp | 105072 | . | .              | .   | . | . | .                               |
| 346 |    | G,T    | . | .              | .   | . | . | AF=0.984;DP=124;FR=R;LCR=       |
| 347 | cp | 105391 | . | A              | G,C | . | . | AF=0.908;DP=141;FR=R;LCR=       |
| 348 | cp | 105437 | . | .              | .   | . | . | .                               |
| 349 |    | .      | . | .              | .   | . | . | AF=;DP=133;FR=R;LCR=            |
| 350 | cp | 105853 | . | .              | .   | . | . | .                               |
| 351 |    | G,T    | . | .              | .   | . | . | AF=0.982;DP=112;FR=R;LCR=       |
| 352 | cp | 105854 | . | A              | C,G | . | . | AF=0.0177;DP=112;FR=R;LCR=      |
| 353 | cp | 105889 | . | C              | A   | . | . | AF=0.0326;DP=92;FR=R;LCR=       |
| 354 | cp | 105912 | . | G              | C   | . | . | AF=0.0326;DP=313;FR=R;LCR=      |
| 355 | cp | 105928 | . | A              | C,G | . | . | AF=0.966;DP=303;FR=R;LCR=       |
| 356 | cp | 106064 | . | G              | T   | . | . | AF=0.0207;DP=145;FR=R;LCR=      |
| 357 | cp | 106226 | . | C              | A   | . | . | AF=0.0129;DP=154;FR=R;LCR=      |
| 358 | cp | 106253 | . | G              | A   | . | . | AF=0.941;DP=136;FR=R;LCR=       |
| 359 | cp | 106619 | . | G              | T   | . | . | AF=0.0135;DP=147;FR=R;LCR=      |
| 360 | cp | 106757 | . | A              | G   | . | . | AF=0.0179;DP=111;FR=R;LCR=      |
| 361 | cp | 107497 | . | C              | A   | . | . | AF=0.016;DP=125;FR=R;LCR=       |
| 362 | cp | 107550 | . | G              | C   | . | . | AF=0.0166;DP=120;FR=R;LCR=      |
| 363 | cp | 107819 | . | G              | T   | . | . | AF=0.0177;DP=112;FR=R;LCR=      |
| 364 | cp | 108374 | . | C              | A   | . | . | AF=0.0144;DP=138;FR=R;LCR=      |
| 365 | cp | 108429 | . | C              | A   | . | . | AF=0.0171;DP=116;FR=R;LCR=      |
| 366 | cp | 108809 | . | G              | T   | . | . | AF=0.0129;DP=154;FR=R;LCR=      |
| 367 | cp | 109167 | . | C              | A   | . | . | AF=0.0147;DP=136;FR=R;LCR=      |
| 368 | cp | 109188 | . | C              | A   | . | . | AF=0.0173;DP=115;FR=R;LCR=      |
| 369 | cp | 109459 | . | C              | A   | . | . | AF=0.017;DP=117;FR=R;LCR=       |
| 370 | cp | 109852 | . | C              | A   | . | . | AF=0.0191;DP=104;FR=R;LCR=      |
| 371 | cp | 110067 | . | C              | A   | . | . | AF=0.0158;DP=126;FR=R;LCR=      |
| 372 | cp | 110534 | . | A              | G,T | . | . | AF=0.985;DP=132;FR=R;LCR=       |
| 373 | cp | 111499 | . | C              | A   | . | . | AF=0.0155;DP=128;FR=R;LCR=      |
| 374 | cp | 111733 | . | G              | T   | . | . | AF=0.0165;DP=120;FR=R;LCR=      |
| 375 | cp | 111765 | . | G              | T   | . | . | AF=0.018;DP=111;FR=R;LCR=       |
| 376 | cp | 112099 | . | A              | G,T | . | . | AF=0.983;DP=116;FR=R;LCR=       |
| 377 | cp | 112260 | . | G              | C,T | . | . | AF=0.984;DP=126;FR=R;LCR=       |
| 378 | cp | 112403 | . | C              | A   | . | . | AF=0.016;DP=124;FR=R;LCR=       |
| 379 | cp | 112442 | . | C              | A   | . | . | AF=0.0176;DP=113;FR=R;LCR=      |
| 380 | cp | 113139 | . | C              | A   | . | . | AF=0.0157;DP=127;FR=R;LCR=      |
| 381 | cp | 113146 | . | C              | A   | . | . | AF=0.0174;DP=114;FR=R;LCR=      |
| 382 | cp | 113157 | . | T              | G   | . | . | AF=0.0257;DP=116;FR=R;LCR=      |
| 383 | cp | 113194 | . | T              | G   | . | . | AF=0.0264;DP=113;FR=R;LCR=      |
| 384 | cp | 113195 | . | C              | A   | . | . | AF=0.0264;DP=113;FR=R;LCR=      |
| 385 | cp | 113274 | . | G              | C,T | . | . | AF=0.0272;DP=110;FR=R;LCR=      |
| 386 | cp | 113281 | . | CATTAAAG C     | .   | . | . | AF=0.0174;DP=230;FR=R;LCR=      |
| 387 | cp | 113323 | . | C              | G   | . | . | AF=0.0296;DP=135;FR=R;LCR=      |
| 388 | cp | 113330 | . | G              | T   | . | . | AF=0.0142;DP=140;FR=R;LCR=      |
| 389 | cp | 113780 | . | C              | A   | . | . | AF=0.0151;DP=132;FR=R;LCR=      |
| 390 | cp | 114159 | . | G              | T   | . | . | AF=0.0156;DP=128;FR=R;LCR=      |

|     |    |        |   |     |              |   |   |                                  |
|-----|----|--------|---|-----|--------------|---|---|----------------------------------|
| 391 | cp | 114431 | . | G   | C            | . | . | AF=0.964;DP=277;FR=R;LCR=        |
| 392 | cp | 114548 | . | A   | G            | . | . | AF=0.97;DP=266;FR=R;LCR=SNR(T)   |
| 393 | cp | 114609 | . | T   | A            | . | . | AF=0.978;DP=268;FR=R;LCR=        |
| 394 | cp | 114743 | . | G   | T            | . | . | AF=0.0104;DP=288;FR=R;LCR=       |
| 395 | cp | 115064 | . | T   | C            | . | . | AF=0.0561;DP=160;FR=R;LCR=       |
| 396 | cp | 115071 | . | A   | C            | . | . | AF=0.0518;DP=154;FR=R;LCR=       |
| 397 | cp | 115341 | . | T   | C,A          | . | . | AF=0.99;DP=193;FR=R;LCR=         |
| 398 | cp | 115358 | . | A   | .            | . | . | AF=;DP=204;FR=R;LCR=             |
| 399 | cp | 115361 | . | T   | .            | . | . | AF=;DP=204;FR=R;LCR=             |
| 400 | cp | 115379 | . | A   | G,T          | . | . | AF=0.987;DP=157;FR=R;LCR=SNR(A)  |
| 401 | cp | 115814 | . | C   | A            | . | . | AF=0.0267;DP=112;FR=R;LCR=       |
| 402 | cp | 115919 | . | G   | T            | . | . | AF=0.017;DP=117;FR=R;LCR=        |
| 403 | cp | 115956 | . | G   | T            | . | . | AF=0.0167;DP=119;FR=R;LCR=       |
| 404 | cp | 116186 | . | G   | T            | . | . | AF=0.0162;DP=123;FR=R;LCR=       |
| 405 | cp | 116406 | . | G   | T            | . | . | AF=0.0146;DP=136;FR=R;LCR=       |
| 406 | cp | 116975 | . | C   | A            | . | . | AF=0.982;DP=111;FR=R;LCR=        |
| 407 | cp | 117009 | . | A   | G            | . | . | AF=0.973;DP=111;FR=R;LCR=        |
| 408 | cp | 117047 | . | C   | T,G          | . | . | AF=0.0171;DP=116;FR=R;LCR=       |
| 409 | cp | 132064 | . | T   | TTGATTG      | . | . | AF=0.0101;DP=198;FR=R;LCR=       |
| 410 | cp | 132117 | . | T   | G            | . | . | AF=0.971;DP=69;FR=R;LCR=SNR      |
| 411 | cp | 132323 | . | G   | T            | . | . | AF=0.0262;DP=76;FR=R;LCR=SNR(T)  |
| 412 | cp | 132733 | . | C   | A            | . | . | AF=0.018;DP=111;FR=R;LCR=        |
| 413 | cp | 132834 | . | T   | G,A          | . | . | AF=0.988;DP=167;FR=R;LCR=        |
| 414 | cp | 132836 | . | G   | C            | . | . | AF=0.0108;DP=184;FR=R;LCR=       |
| 415 | cp | 132894 | . | AGA | A            | . | . | AF=1;DP=195;FR=R;LCR=            |
| 416 | cp | 133034 | . | T   | TCTGTTTCATCA | . | . | AF=0.976;DP=168;FR=R;LCR=        |
| 417 | cp | 133069 | . | A   | G,T          | . | . | AF=0.988;DP=258;FR=R;LCR=        |
| 418 | cp | 133077 | . | G   | T            | . | . | AF=0.0123;DP=243;FR=R;LCR=       |
| 419 | cp | 133078 | . | A   | T            | . | . | AF=0.0123;DP=243;FR=R;LCR=       |
| 420 | cp | 133678 | . | G   | T            | . | . | AF=0.0118;DP=255;FR=R;LCR=       |
| 421 | cp | 133893 | . | G   | A            | . | . | AF=0.0165;DP=120;FR=R;LCR=       |
| 422 | cp | 133938 | . | A   | G            | . | . | AF=0.0192;DP=104;FR=R;LCR=       |
| 423 | cp | 134177 | . | C   | A            | . | . | AF=0.0193;DP=155;FR=R;LCR=       |
| 424 | cp | 134440 | . | T   | C            | . | . | AF=0.0152;DP=131;FR=R;LCR=       |
| 425 | cp | 134612 | . | G   | T            | . | . | AF=0.0165;DP=120;FR=R;LCR=       |
| 426 | cp | 134726 | . | A   | T            | . | . | AF=0.0101;DP=297;FR=R;LCR=SNR    |
| 427 | cp | 135016 | . | C   | A            | . | . | AF=0.0186;DP=107;FR=R;LCR=SNR(T) |
| 428 | cp | 137723 | . | G   | T            | . | . | AF=0.0175;DP=114;FR=R;LCR=       |
| 429 | cp | 137835 | . | C   | G            | . | . | AF=0.0112;DP=355;FR=R;LCR=       |
| 430 | cp | 137882 | . | G   | T            | . | . | AF=0.0163;DP=122;FR=R;LCR=       |
| 431 | cp | 138049 | . | C   | A            | . | . | AF=0.0144;DP=138;FR=R;LCR=       |
| 432 | cp | 138189 | . | T   | C            | . | . | AF=0.016;DP=125;FR=R;LCR=        |
| 433 | cp | 138594 | . | C   | A            | . | . | AF=0.0105;DP=286;FR=R;LCR=       |
| 434 | cp | 138801 | . | G   | T            | . | . | AF=0.0134;DP=148;FR=R;LCR=       |
| 435 | cp | 139170 | . | C   | A            | . | . | AF=0.0168;DP=118;FR=R;LCR=       |
| 436 | cp | 139329 | . | G   | T            | . | . | AF=0.0191;DP=104;FR=R;LCR=       |
| 437 | cp | 139394 | . | G   | C            | . | . | AF=0.0179;DP=111;FR=R;LCR=       |
| 438 | cp | 139966 | . | C   | A            | . | . | AF=0.0196;DP=101;FR=R;LCR=       |
| 439 | cp | 140338 | . | G   | T            | . | . | AF=0.016;DP=124;FR=R;LCR=        |
| 440 | cp | 140537 | . | C   | A            | . | . | AF=0.0162;DP=123;FR=R;LCR=       |
| 441 | cp | 140612 | . | C   | A            | . | . | AF=0.0155;DP=129;FR=R;LCR=       |
| 442 | cp | 141795 | . | G   | T            | . | . | AF=0.0137;DP=146;FR=R;LCR=       |
| 443 | cp | 141797 | . | G   | T            | . | . | AF=0.0134;DP=148;FR=R;LCR=       |
| 444 | cp | 141938 | . | G   | T            | . | . | AF=0.0173;DP=115;FR=R;LCR=       |
| 445 | cp | 142220 | . | G   | T            | . | . | AF=0.0159;DP=125;FR=R;LCR=       |
| 446 | cp | 142596 | . | G   | T            | . | . | AF=0.0173;DP=115;FR=R;LCR=       |
| 447 | cp | 142656 | . | C   | A            | . | . | AF=0.0159;DP=125;FR=R;LCR=       |
| 448 | cp | 142825 | . | G   | T            | . | . | AF=0.0164;DP=121;FR=R;LCR=       |
| 449 | cp | 142896 | . | C   | A            | . | . | AF=0.0179;DP=111;FR=R;LCR=       |
| 450 | cp | 142958 | . | C   | A            | . | . | AF=0.017;DP=117;FR=R;LCR=        |



|     |    |        |   |              |       |   |   |                               |
|-----|----|--------|---|--------------|-------|---|---|-------------------------------|
| 451 | cp | 143331 | . | G            | T     | . | . | AF=0.0133;DP=150;FR=R;LCR=    |
| 452 | cp | 143399 | . | C            | A     | . | . | AF=0.0179;DP=111;FR=R;LCR=    |
| 453 | cp | 143970 | . | A            | G,T   | . | . | AF=0.977;DP=131;FR=R;LCR=     |
| 454 | cp | 144378 | . | G            | T,C   | . | . | AF=0.0179;DP=111;FR=R;LCR=    |
| 455 | cp | 145210 | . | A            | G     | . | . | AF=0.0171;DP=116;FR=R;LCR=    |
| 456 | cp | 145633 | . | G            | T     | . | . | AF=0.0161;DP=124;FR=R;LCR=    |
| 457 | cp | 146971 | . | C            | T     | . | . | AF=0.986;DP=142;FR=R;LCR=SNR  |
| 458 | cp | 146994 | . | T            | TNAA. | . | . | AF=0;DP=256;FR=R;LCR=         |
| 459 | cp | 146994 | . | T            | TNAA. | . | . | AF=0;DP=256;FR=R;LCR=         |
| 460 | cp | 147040 | . | G            | T     | . | . | AF=0.0167;DP=119;FR=R;LCR=    |
| 461 | cp | 147080 | . | AGATTATAAGAT | A     | . | . | AF=0.984;DP=258;FR=R;LCR=     |
| 462 | cp | 147548 | . | G            | T,C   | . | . | AF=0.017;DP=117;FR=R;LCR=     |
| 463 | cp | 147650 | . | G            | T     | . | . | AF=0.016;DP=125;FR=R;LCR=     |
| 464 | cp | 147685 | . | C            | A     | . | . | AF=0.0154;DP=129;FR=R;LCR=    |
| 465 | cp | 148071 | . | G            | T     | . | . | AF=0.0152;DP=131;FR=R;LCR=    |
| 466 | cp | 148215 | . | G            | T     | . | . | AF=0.983;DP=119;FR=R;LCR=     |
| 467 | cp | 148334 | . | G            | T     | . | . | AF=0.013;DP=307;FR=R;LCR=     |
| 468 | cp | 148385 | . | C            | A     | . | . | AF=0.0179;DP=111;FR=R;LCR=    |
| 469 | cp | 148535 | . | C            | A     | . | . | AF=0.0168;DP=118;FR=R;LCR=    |
| 470 | cp | 148652 | . | G            | T     | . | . | AF=0.0153;DP=130;FR=R;LCR=    |
| 471 | cp | 148936 | . | C            | A     | . | . | AF=0.0174;DP=114;FR=R;LCR=    |
| 472 | cp | 148954 | . | C            | A     | . | . | AF=0.017;DP=117;FR=R;LCR=     |
| 473 | cp | 149262 | . | G            | T     | . | . | AF=0.0132;DP=151;FR=R;LCR=    |
| 474 | cp | 149298 | . |              |       |   |   |                               |
| 475 |    | G,A    | . |              |       |   |   | AF=0.976;DP=123;FR=R;LCR=     |
| 476 | cp | 149486 | . | TTCAGAAT     | T     | . | . | AF=0.0121;DP=248;FR=R;LCR=    |
| 477 | cp | 149499 | . | A            | T     | . | . | AF=0.0163;DP=123;FR=R;LCR=    |
| 478 | cp | 149893 | . | T            | G     | . | . | AF=0.0186;DP=107;FR=R;LCR=    |
| 479 | cp | 150167 | . | G            | T     | . | . | AF=0.0149;DP=134;FR=R;LCR=    |
| 480 | cp | 150347 | . | G            | T     | . | . | AF=0.0207;DP=144;FR=R;LCR=    |
| 481 | cp | 150356 | . | T            | C     | . | . | AF=0.0155;DP=128;FR=R;LCR=    |
| 482 | cp | 150415 | . | T            | C,A   | . | . | AF=0.983;DP=114;FR=R;LCR=     |
| 483 | cp | 150946 | . | C            | A     | . | . | AF=0.0149;DP=134;FR=R;LCR=    |
| 484 | cp | 151122 | . | C            | A     | . | . | AF=0.0139;DP=144;FR=R;LCR=    |
| 485 | cp | 151182 | . | C            | A     | . | . | AF=0.016;DP=124;FR=R;LCR=     |
| 486 | cp | 151517 | . | C            | A     | . | . | AF=0.0181;DP=110;FR=R;LCR=    |
| 487 | cp | 152058 | . | C            | A     | . | . | AF=0.0151;DP=330;FR=R;LCR=SNR |
| 488 | cp | 152228 | . | G            | A     | . | . | AF=0.0156;DP=128;FR=R;LCR=    |
| 489 | cp | 152233 | . | C            | T     | . | . | AF=0.0163;DP=122;FR=R;LCR=    |
| 490 | cp | 152239 | . | G            | A,T   | . | . | AF=0.0166;DP=120;FR=R;LCR=    |
| 491 | cp | 152370 | . | G            | A     | . | . | AF=0.0181;DP=110;FR=R;LCR=    |
| 492 | cp | 152685 | . | C            | A     | . | . | AF=0.0148;DP=135;FR=R;LCR=    |
| 493 | cp | 152798 | . | A            | G     | . | . | AF=0.0134;DP=149;FR=R;LCR=    |
| 494 | cp | 152823 | . | C            | A     | . | . | AF=0.015;DP=133;FR=R;LCR=     |
| 495 | cp | 153092 | . | C            | A     | . | . | AF=0.0138;DP=145;FR=R;LCR=    |
| 496 | cp | 153149 | . | G            | T     | . | . | AF=0.0129;DP=154;FR=R;LCR=    |
| 497 | cp | 153202 | . | A            | G,T   | . | . | AF=0.987;DP=149;FR=R;LCR=     |
| 498 | cp | 153326 | . | T            | C     | . | . | AF=0.0161;DP=123;FR=R;LCR=    |
| 499 | cp | 153737 | . | C            | A     | . | . | AF=0.0131;DP=153;FR=R;LCR=    |
| 500 | cp | 154239 | . | G            | T     | . | . | AF=0.0161;DP=124;FR=R;LCR=    |
| 501 | cp | 154388 | . | G            | T     | . | . | AF=0.0139;DP=144;FR=R;LCR=    |
| 502 | cp | 154429 | . | G            | A     | . | . | AF=0.0138;DP=145;FR=R;LCR=    |
| 503 | cp | 154989 | . | G            | T     | . | . | AF=0.0165;DP=120;FR=R;LCR=    |
| 504 | cp | 155386 | . | C            | A     | . | . | AF=0.0149;DP=134;FR=R;LCR=    |
| 505 | cp | 155387 | . | G            | T     | . | . | AF=0.0151;DP=132;FR=R;LCR=    |
| 506 | cp | 155395 | . | G            | T     | . | . | AF=0.0161;DP=123;FR=R;LCR=    |
| 507 | cp | 155736 | . | C            | A     | . | . | AF=0.0179;DP=111;FR=R;LCR=    |
| 508 | cp | 155808 | . | C            | A     | . | . | AF=0.0139;DP=143;FR=R;LCR=    |
| 509 | cp | 155858 | . | G            | A     | . | . | AF=0.0132;DP=151;FR=R;LCR=    |
| 510 | cp | 155883 | . | G            | A     | . | . | AF=0.013;DP=153;FR=R;LCR=     |

|     |    |        |   |    |     |   |   |                               |
|-----|----|--------|---|----|-----|---|---|-------------------------------|
| 511 | cp | 156055 | . | C  | A,T | . | . | AF=0.0174,;DP=115;FR=R;LCR=   |
| 512 | cp | 156280 | . | C  | A   | . | . | AF=0.0174;DP=114;FR=R;LCR=SNR |
| 513 | cp | 156893 | . | A  | G,T | . | . | AF=0.983,;DP=118;FR=R;LCR=    |
| 514 | cp | 156952 | . | C  | A   | . | . | AF=0.015;DP=133;FR=R;LCR=     |
| 515 | cp | 157141 | . | G  | T   | . | . | AF=0.0177;DP=112;FR=R;LCR=    |
| 516 | cp | 157706 | . | T  | G,C | . | . | AF=0.974,;DP=116;FR=R;LCR=    |
| 517 | cp | 157904 | . | T  | C,A | . | . | AF=0.986,;DP=294;FR=R;LCR=SNR |
| 518 | cp | 157943 | . | A  | T   | . | . | AF=0.0168;DP=119;FR=R;LCR=    |
| 519 | cp | 157954 | . | C  | A   | . | . | AF=0.0244;DP=122;FR=R;LCR=    |
| 520 | cp | 157981 | . | G  | T   | . | . | AF=0.015;DP=133;FR=R;LCR=     |
| 521 | cp | 158455 | . | A  | G,T | . | . | AF=0.98,;DP=148;FR=R;LCR=     |
| 522 | cp | 158772 | . | C  | A   | . | . | AF=0.0149;DP=133;FR=R;LCR=    |
| 523 | cp | 159533 | . | G  | T   | . | . | AF=0.0137;DP=418;FR=F;LCR=    |
| 524 | cp | 159762 | . | G  | T   | . | . | AF=0.0168;DP=119;FR=R;LCR=    |
| 525 | cp | 160254 | . | C  | T   | . | . | AF=0.0155;DP=193;FR=F;LCR=    |
| 526 | cp | 160594 | . | G  | A   | . | . | AF=0.0157;DP=254;FR=F;LCR=    |
| 527 | cp | 160684 | . | C  | A   | . | . | AF=0.0188;DP=106;FR=R;LCR=    |
| 528 | cp | 160713 | . | C  | A   | . | . | AF=0.0188;DP=106;FR=R;LCR=    |
| 529 | cp | 161320 | . | G  | T   | . | . | AF=0.0109;DP=274;FR=F;LCR=    |
| 530 | cp | 161523 | . | A  | T   | . | . | AF=0.0145;DP=207;FR=F;LCR=    |
| 531 | cp | 161561 | . | C  | A   | . | . | AF=0.0104;DP=192;FR=F;LCR=    |
| 532 | cp | 161741 | . | G  | A   | . | . | AF=0.0117;DP=256;FR=F;LCR=    |
| 533 | cp | 162276 | . | CC | C   | . | . | AF=0.0109;DP=274;FR=R;LCR=SNR |
| 534 | cp | 162276 | . | CC | C   | . | . | AF=0.0109;DP=274;FR=R;LCR=SNR |
| 535 | cp | 162278 | . | C  | .   | . | . | AF=,;DP=3;FR=R;LCR=SNR        |
| 536 | cp | 162278 | . | C  | .   | . | . | AF=,;DP=3;FR=R;LCR=SNR        |
| 537 | cp | 162307 | . | T  | C   | . | . | AF=0.0107;DP=186;FR=F;LCR=SNR |
| 538 | cp | 162361 | . | G  | T   | . | . | AF=0.0112;DP=179;FR=F;LCR=    |
| 539 | cp | 162365 | . | A  | T,C | . | . | AF=0.99,;DP=199;FR=F;LCR=     |
| 540 | cp | 162387 | . | G  | T   | . | . | AF=0.0132;DP=151;FR=F;LCR=SNR |
| 541 | cp | 162426 | . | T  | A   | . | . | AF=0.0208;DP=144;FR=F;LCR=SNR |
| 542 | cp | 162481 | . | A  | G   | . | . | AF=0.0103;DP=193;FR=F;LCR=    |

543 **Figure S12. The original and full-length gel electrophoresis results of the**  
544 **amplification of DNA barcodes using designed primers.**

545 This is the original and uncropped gel electrophoresis plot for the cropped image shown in Figure 7.  
546 Lane M was the marker of DL1000. The upper lanes from left to right corresponded to products  
547 amplified from the individual 1 and individual 2 of *A. galanga* (Alga), *A. hainanensis* (Alha), *A. nigra*  
548 (*Alni*), *A. officinarum* (Alof), and *A. oxyphylla* (Alox) by primer Alpp, respectively. The lower lanes  
549 from left to right corresponded to products amplified from the individual 2 and individual 1 of Alga,  
550 Alha, Alni, Alof, and Alox by primer Alpr, respectively.

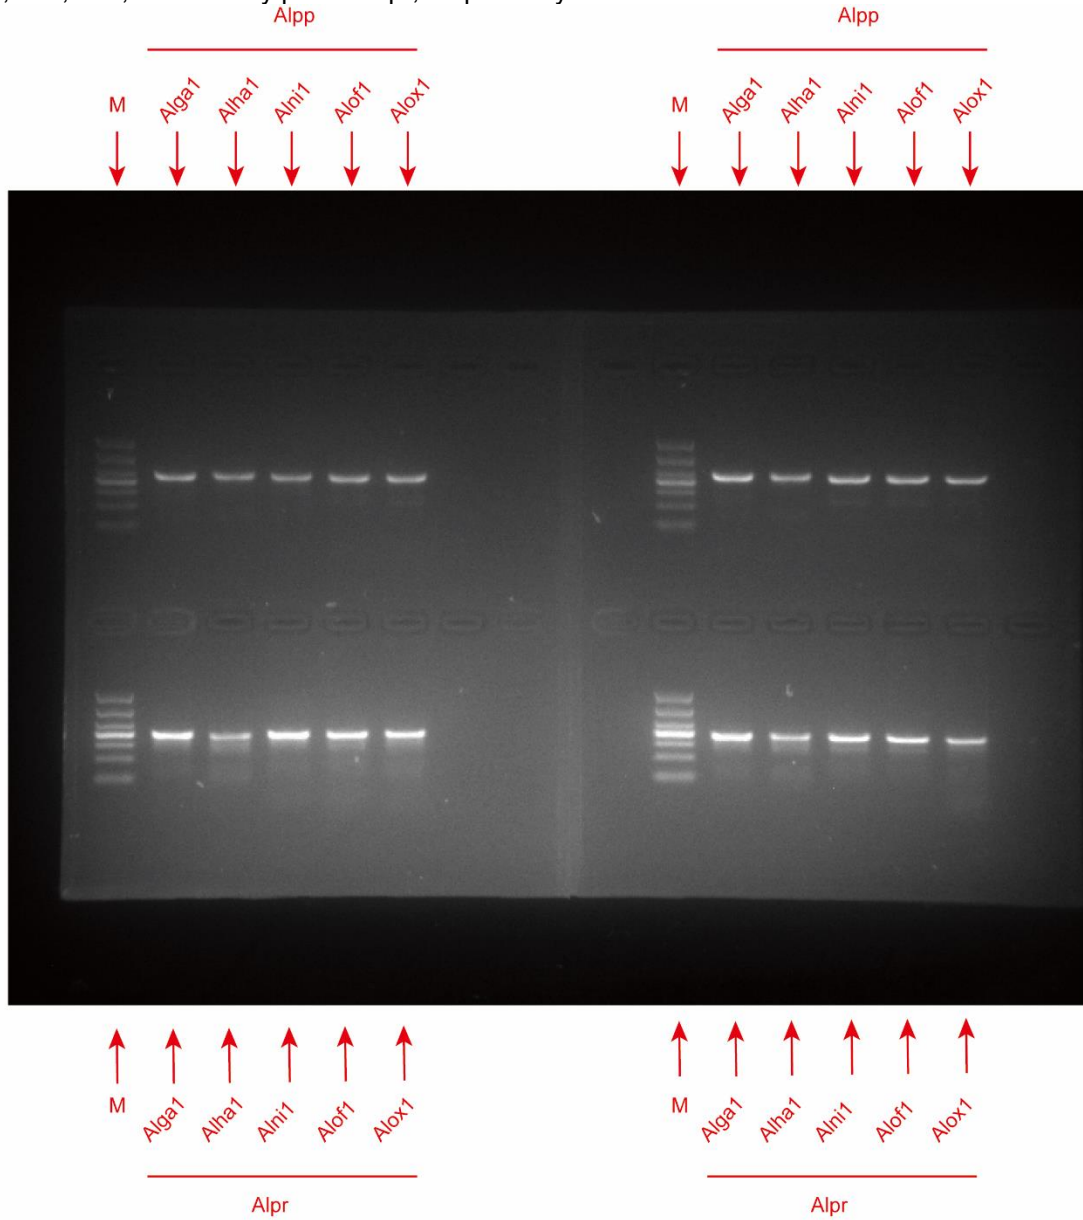

551

552 **Figure S13. The alignment of amplicons produced by designed Alpp primers.**

553 The ID of each sequence is shown on the left side of each panel. The ID is the concatenation of  
 554 species name, plant individual id, and primer name. The rightmost number in each column represents  
 555 the position of the base at that position in the amplicon. The SNPs and Indel are shown in red  
 556 squares. The nucleotides identical across all plastomes are shaded in black, whereas those  
 557 conserved in 60% of the sequences are shaded in gray. *Alpinia galanga*: Alga; *A. hainanensis*: Alha;  
 558 *A. nigra*: Alni; *A. officinarum*: Aloh; *A. oxyphylla*: Alox. Arabic numerals represent different individuals.

|     |            |                                                                       |       |
|-----|------------|-----------------------------------------------------------------------|-------|
| 560 | Alga1_Alpp | -----aaaagtca-acga--tcacacaggt-aaatgtag                               | : 29  |
| 561 | Alga2_Alpp | -----t-caaaacat-cgaa--tcacacaggt-aaatgtag                             | : 31  |
| 562 | Alga3_Alpp | -----gcaaagaacga-tcga--atcacacaggt-aaatgtag                           | : 32  |
| 563 | Alga4_Alpp | -----a--cagactaatcgca--tcacacaggt-aaatgtag                            | : 32  |
| 564 | Alga6_Alpp | -----gcgaca-atga--atcacacaggt-aaatgtag                                | : 27  |
| 565 | Alga7_Alpp | -----a--cacaggga-acga--atcacacaggt-aaatgtag                           | : 31  |
| 566 | Alga8_Alpp | -----gaaaaggcaaa--cga--atcacacaggt-aaatgtag                           | : 32  |
| 567 | Alga0_Alpp | agaacagttggccttcgattatTTTggatcgatcg-aaat--acacacaggt-aaatgtag         | : 57  |
| 568 | Alha1_Alpp | a-----aaagcga-acga--tacacacaggt-aaatgtag                              | : 30  |
| 569 | Alha2_Alpp | c-----aagacta-acga--atcacacaggt-aaatgtag                              | : 30  |
| 570 | Alha3_Alpp | caaaacatgcat-----cga--tcacacaggt-aaatgtag                             | : 32  |
| 571 | Alha6_Alpp | a-----cagaca-acga--taaacacaggt-aaatgtag                               | : 28  |
| 572 | Alha7_Alpp | ccaaaaggccaa-----cgaa--tacacacaggt-aaatgtag                           | : 34  |
| 573 | Alha8_Alpp | acaagcatcga-----tcacacaggt-aaatgtag                                   | : 27  |
| 574 | Alha0_Alpp | agaacagttggccttcgattatTTTggatcgatcg-aaat--acacacaggt-aaatgtag         | : 57  |
| 575 | Alni1_Alpp | -----caagccat-cgaa--tcacacaggt-aaatgtag                               | : 29  |
| 576 | Alni2_Alpp | -----c--aaatacat-cgaa--tcacacaggt-aaatgtag                            | : 30  |
| 577 | Alni3_Alpp | -----c--acaagact-atcg--atcacacaggt-aaatgtag                           | : 30  |
| 578 | Alni4_Alpp | -----g--aaagacat-cgaa--tacacacaggt-aaatgtag                           | : 30  |
| 579 | Alni6_Alpp | -----a--aaagacca-tcga--tcacacaggt-aaatgtag                            | : 30  |
| 580 | Alni7_Alpp | -----g--cagaacca-acga--tcacacaggt-aaatgtag                            | : 31  |
| 581 | Alni8_Alpp | -----ccaatgaaggc-atcg--atcacacaggt-aaatgtag                           | : 32  |
| 582 | Alni0_Alpp | agaacagttggccttcgattatTTTggatcgatcg-aaat--acacacaggt-aaatgtag         | : 57  |
| 583 | Alof1_Alpp | -----cagaacaa-tcga--tcacacaggt-aaatgtag                               | : 30  |
| 584 | Alof2_Alpp | -----aaaggca-acga--tacacacaggt-aaatgtag                               | : 28  |
| 585 | Alof3_Alpp | -----aaagaaa-tcga--atcacacaggt-aaatgtag                               | : 29  |
| 586 | Alof4_Alpp | -----gcatacaa-tcga--taaacacaggt-aaatgtag                              | : 29  |
| 587 | Alof6_Alpp | -----gaagacca-tcg--atcacacaggt-aaatgtag                               | : 28  |
| 588 | Alof7_Alpp | -----acagacca-acgaatacacacaggt-aaatgtag                               | : 31  |
| 589 | Alof8_Alpp | -----gaaagtcca-tcga--taaacacaggt-aaatgtag                             | : 30  |
| 590 | Alof0_Alpp | agaacagttggccttcgattatTTTggatcgatcg-aaat--acacacaggt-aaatgtag         | : 57  |
| 591 | Alox1_Alpp | -----aagaacaa-acga--atcacacaggt-aaatgtag                              | : 29  |
| 592 | Alox2_Alpp | g-----aaaggcaaa-cgaa--tcacacaggt-aaatgtag                             | : 32  |
| 593 | Alox3_Alpp | -----gaagaacaa-tcga--tcacacaggt-aaatgtag                              | : 30  |
| 594 | Alox6_Alpp | g-----aaggccca-acga--atcacacaggt-aaatgtag                             | : 31  |
| 595 | Alox7_Alpp | -----aaagggcaa-tcga--tcacacaggt-aaatgtag                              | : 31  |
| 596 | Alox0_Alpp | agaacagttggccttcgattatTTTggatcgatcg-aaat--acacacaggt-aaatgtag         | : 57  |
| 597 |            |                                                                       |       |
| 598 | Alga1_Alpp | ccaaaaaaaaagaattgggctgctatTTTgatgtaactatTTtagatataatctaatc <b>atg</b> | : 89  |
| 599 | Alga2_Alpp | ccaaaaaaaaagaattgggctgctatTTTgatgtaactatTTtagatataatctaatc <b>atg</b> | : 91  |
| 600 | Alga3_Alpp | ccaaaaaaaaagaattgggctgctatTTTgatgtaactatTTtagatataatctaatc <b>atg</b> | : 92  |
| 601 | Alga4_Alpp | ccaaaaaaaaagaattgggctgctatTTTgatgtaactatTTtagatataatctaatc <b>atg</b> | : 92  |
| 602 | Alga6_Alpp | ccaaaaaaaaagaattgggctgctatTTTgatgtaactatTTtagatataatctaatc <b>atg</b> | : 87  |
| 603 | Alga7_Alpp | ccaaaaaaaaagaattgggctgctatTTTgatgtaactatTTtagatataatctaatc <b>atg</b> | : 91  |
| 604 | Alga8_Alpp | ccaaaaaaaaagaattgggctgctatTTTgatgtaactatTTtagatataatctaatc <b>atg</b> | : 92  |
| 605 | Alga0_Alpp | ccaaaaaaaaagaattgggctgctatTTTgatgtaactatTTtagatataatctaatc <b>atg</b> | : 117 |
| 606 | Alha1_Alpp | ccaaaaaaaaagaattgggctgctatTTTgatgtaactatTTtagatataatctaatc <b>atg</b> | : 90  |
| 607 | Alha2_Alpp | ccaaaaaaaaagaattgggctgctatTTTgatgtaactatTTtagatataatctaatc <b>atg</b> | : 90  |
| 608 | Alha3_Alpp | ccaaaaaaaaagaattgggctgctatTTTgatgtaactatTTtagatataatctaatc <b>atg</b> | : 92  |
| 609 | Alha6_Alpp | ccaaaaaaaaagaattgggctgctatTTTgatgtaactatTTtagatataatctaatc <b>atg</b> | : 88  |
| 610 | Alha7_Alpp | ccaaaaaaaaagaattgggctgctatTTTgatgtaactatTTtagatataatctaatc <b>atg</b> | : 94  |
| 611 | Alha8_Alpp | ccaaaaaaaaagaattgggctgctatTTTgatgtaactatTTtagatataatctaatc <b>atg</b> | : 87  |
| 612 | Alha0_Alpp | ccaaaaaaaaagaattgggctgctatTTTgatgtaactatTTtagatataatctaatc <b>atg</b> | : 117 |
| 613 | Alni1_Alpp | ccaaaaaaaaagaattgggctgctatTTTgatgtaactatTTtagatataatctaatc <b>atg</b> | : 89  |
| 614 | Alni2_Alpp | ccaaaaaaaaagaattgggctgctatTTTgatgtaactatTTtagatataatctaatc <b>atg</b> | : 90  |
| 615 | Alni3_Alpp | ccaaaaaaaaagaattgggctgctatTTTgatgtaactatTTtagatataatctaatc <b>atg</b> | : 90  |
| 616 | Alni4_Alpp | ccaaaaaaaaagaattgggctgctatTTTgatgtaactatTTtagatataatctaatc <b>atg</b> | : 90  |
| 617 | Alni6_Alpp | ccaaaaaaaaagaattgggctgctatTTTgatgtaactatTTtagatataatctaatc <b>atg</b> | : 90  |
| 618 | Alni7_Alpp | ccaaaaaaaaagaattgggctgctatTTTgatgtaactatTTtagatataatctaatc <b>atg</b> | : 91  |
| 619 | Alni8_Alpp | ccaaaaaaaaagaattgggctgctatTTTgatgtaactatTTtagatataatctaatc <b>atg</b> | : 92  |
| 620 | Alni0_Alpp | ccaaaaaaaaagaattgggctgctatTTTgatgtaactatTTtagatataatctaatc <b>atg</b> | : 117 |
| 621 | Alof1_Alpp | ccaaaaaaaaagaattgggctgctatTTTgatgtaactatTTtagatataatctaatc <b>atg</b> | : 90  |



```

694 Alni7_Alpp : gaaaagcccttggcttaggtcaataatttagtgcggtgctccccggggtaatgaataaga : 195
695 Alni8_Alpp : gaaaagcccttattctagatcaataatttagtgcggtgctccagggaagataatgaataatga : 197
696 Alni0_Alpp : gaaaagcccatatctagatcaataataataaccaactctccatgaaaataatgaataatga : 222
697 Alof1_Alpp : gaaaaggtctatattctagatcaataataataaccaactctctatgaaaataatgaataatga : 194
698 Alof2_Alpp : gaaaaggtctatattctagatcaataataataaccaactctctatgaaaataatgaataatga : 192
699 Alof3_Alpp : gaaaaggtctatattctagatcaataataataaccaactctctatgaaaataatgaataatga : 193
700 Alof4_Alpp : gaaaaggtctatattctagatcaataataataaccaactctctatgaaaataatgaataatga : 193
701 Alof6_Alpp : gaaaaggtctatattctagatcaataataataaccaactctctatgaaaataatgaataatga : 192
702 Alof7_Alpp : gaaaaggtctatattctagatcaataataataaccaactctctatgaaaataatgaataatga : 195
703 Alof8_Alpp : gaaaaggtctatattctagatcaataataataaccaactctctatgaaaataatgaataatga : 194
704 Alof0_Alpp : gaaaaggtctatattctagatcaataataataaccaactctctatgaaaataatgaataatga : 221
705 Alox1_Alpp : gaaaaggtctatattctagatcaataataataaccaactctctatgaaaataatgaataatga : 193
706 Alox2_Alpp : gaaaaggtctatattctagatcaataataataaccaactctctatgaaaataatgaataatga : 196
707 Alox3_Alpp : gaaaaggtctatattctagatcaataataataaccaactctctatgaaaataatgaataatga : 194
708 Alox6_Alpp : gaaaaggtctatattctagatcaataataataaccaactctctatgaaaataatgaataatga : 195
709 Alox7_Alpp : gaaaaggtctatattctagatcaataataataaccaactctctatgaaaataatgaataatga : 195
710 Alox0_Alpp : gaaaaggtctatattctagatcaataataataaccaactctctatgaaaataatgaataatga : 221
711
712 Alga1_Alpp : gaaggccaactggttcta----- : 223
713 Alga2_Alpp : gaaggccaactggttcta-----tataccatactatctaggcttagatagtagta : 257
714 Alga3_Alpp : gaaggccaactggttcta-----tataccatactatctaggcttagatagtagta : 258
715 Alga4_Alpp : gaaggccaactggttcta-----tataccatactatctaggcttagatagtagta : 258
716 Alga6_Alpp : gaaggccaactggttcta----- : 221
717 Alga7_Alpp : gaagaccaactggttcta----- : 225
718 Alga8_Alpp : gaagaccaactggttcta-----tataccatactatctaggcttagatagtagta : 258
719 Alga0_Alpp : taatatatactatataatagtagataactataccatactatctaggcttagatagtagta : 283
720 Alha1_Alpp : taatatatactatataatagtagataactataccatactatctaggcttagatagtagta : 257
721 Alha2_Alpp : taatatatactatataatagtagataactataccatactatctaggcttagatagtagta : 257
722 Alha3_Alpp : taatatatactatataatagtagataactataccatactatctaggcttagatagtagta : 259
723 Alha6_Alpp : taatatatactatataatagtagataactataccatactatctaggcttagatagtagta : 255
724 Alha7_Alpp : taatatatactatataatagtagataactataccatactatctaggcttagatagtagta : 261
725 Alha8_Alpp : taatatatactatataatagtagataactataccatactatctaggcttagatagtagta : 254
726 Alha0_Alpp : taatatatactatataatagtagataactataccatactatctaggcttagatagtagta : 284
727 Alni1_Alpp : gaaggatactggtataatagtagataactataccatactatctaggcttagatagtagta : 254
728 Alni2_Alpp : gaaggatactggactatagaagataactataccatactatctaggcttagatagtagta : 255
729 Alni3_Alpp : gaaggatactgtataatagtagataactataccatactatctaggcttagatagtagta : 255
730 Alni4_Alpp : gaaggatactggtataatagtagataactataccatactatctaggcttagatagtagta : 255
731 Alni6_Alpp : gaaggccaactggttctatataccgtaaccacaccgtaactaaccaggcttacacagaactt : 254
732 Alni7_Alpp : gaaggatactggtataatagaagataactataccatactatctaggcttagatagtagta : 255
733 Alni8_Alpp : gaaggatactgtataatagtagataactataccatactatctaggcttagatagtagta : 257
734 Alni0_Alpp : taatatatactatataatagtagataactataccatactatctaggcttagatagtagta : 282
735 Alof1_Alpp : taatatatactatataatagtagataactataccatactatctaggcttagatagtagta : 242
736 Alof2_Alpp : taatatatactatataatagtagataactataccatactatctaggcttagatagtagta : 240
737 Alof3_Alpp : taatatatactatataatagtagataactataccatactatctaggcttagatagtagta : 241
738 Alof4_Alpp : taatatatactatataatagtagataactataccatactatctaggcttagatagtagta : 241
739 Alof6_Alpp : taatatatactatataatagtagataactataccatactatctaggcttagatagtagta : 240
740 Alof7_Alpp : taatatatactatataatagtagataactataccatactatctaggcttagatagtagta : 243
741 Alof8_Alpp : taatatatactatataatagtagataactataccatactatctaggcttagatagtagta : 242
742 Alof0_Alpp : taatatatactatataatagtagataactataccatactatctaggcttagatagtagta : 269
743 Alox1_Alpp : taatatatactatataatagtagataactataccatactatctaggcttagatagtagta : 241
744 Alox2_Alpp : taatatatactatataatagtagataactataccatactatctaggcttagatagtagta : 244
745 Alox3_Alpp : taatatatactatataatagtagataactataccatactatctaggcttagatagtagta : 242
746 Alox6_Alpp : taatatatactatataatagtagataactataccatactatctaggcttagatagtagta : 243
747 Alox7_Alpp : taatatatactatataatagtagataactataccatactatctaggcttagatagtagta : 243
748 Alox0_Alpp : taatatatactatataatagtagataactataccatactatctaggcttagatagtagta : 269
749
750 Alga1_Alpp : ----- : -
751 Alga2_Alpp : tctcagatacttatctcagatacttatgattccagccagatcatttctttogtttaa : 317
752 Alga3_Alpp : tctcagatacttatctcagatacttatgattccagccagatcatttctttogtttaa : 318
753 Alga4_Alpp : tctcagatacttatctcagatacttatgattccagccagatcatttctttogtttaa : 318
754 Alga6_Alpp : ----- : -
755 Alga7_Alpp : ----- : -
756 Alga8_Alpp : tctcagatacttatctcagatacttatgattccagccagatcatttctttogtttaa : 318
757 Alga0_Alpp : tctcagatacttatctcagatacttatgattccagccagatcatttctttogtttaa : 343
758 Alha1_Alpp : tctcagatacttatctcagatacttatgattccagccagatcatttctttogtttaa : 317
759 Alha2_Alpp : tctcagatacttatctcagatacttatgattccagccagatcatttctttogtttaa : 317
760 Alha3_Alpp : tctcagatacttatctcagatacttatgattccagccagatcatttctttogtttaa : 319
761 Alha6_Alpp : tctcagatacttatctcagatacttatgattccagccagatcatttctttogtttaa : 315
762 Alha7_Alpp : tctcagatacttatctcagatacttatgattccagccagatcatttctttogtttaa : 321
763 Alha8_Alpp : tctcagatacttatctcagatacttatgattccagccagatcatttctttogtttaa : 314
764 Alha0_Alpp : tctcagatacttatctcagatacttatgattccagccagatcatttctttogtttaa : 344
765 Alni1_Alpp : tctaagatacttatctcagatacttatattccagccagatcatttctttogtttaa : 314

```

```

766 Alni2_Alpp : tctaagatacttatatctcagatacttatattccagccggatcatttctttcgtttaa : 315
767 Alni3_Alpp : tctaagatacttatatctcagatacttatattccagccggatcatttctttcgtttaa : 315
768 Alni4_Alpp : tctaagatacttatatctcagatacttatattccagccggatcatttctttcgtttaa : 315
769 Alni6_Alpp : tctaataccctcatatctcagatacttatattccagccggatcatttctttcgtttaa : 314
770 Alni7_Alpp : tctaagatacttatatctcagatacttatattccagccggatcatttctttcgtttaa : 315
771 Alni8_Alpp : tctaagatacttatatctcagatacttatattccagccggatcatttctttcgtttaa : 317
772 Alni0_Alpp : tctaagatacttatatctcagatacttatattccagccggatcatttctttcgtttaa : 342
773 Alof1_Alpp : -----tatctcagatacttatgattccagccagatcatttctttcgtttaa : 288
774 Alof2_Alpp : -----tatctcagatacttatgattccagccagatcatttctttcgtttaa : 286
775 Alof3_Alpp : -----tatctcagatacttatgattccagccagatcatttctttcgtttaa : 287
776 Alof4_Alpp : -----tatctcagatacttatgattccagccagatcatttctttcgtttaa : 287
777 Alof6_Alpp : -----tatctcagatacttatgattccagccagatcatttctttcgtttaa : 286
778 Alof7_Alpp : -----tatctcagatacttatgattccagccagatcatttctttcgtttaa : 289
779 Alof8_Alpp : -----tatctcagatacttatgattccagccagatcatttctttcgtttaa : 288
780 Alof0_Alpp : -----tatctcagatacttatgattccagccagatcatttctttcgtttaa : 315
781 Alox1_Alpp : -----tatctcagatacttatgattccagccagatcatttctttcgtttaa : 287
782 Alox2_Alpp : -----tatctcagatacttatgattccagccagatcatttctttcgtttaa : 290
783 Alox3_Alpp : -----tatctcagatacttatgattccagccagatcatttctttcgtttaa : 288
784 Alox6_Alpp : -----tatctcagatacttatgattccagccagatcatttctttcgtttaa : 289
785 Alox7_Alpp : -----tatctcagatacttatgattccagccagatcatttctttcgtttaa : 289
786 Alox0_Alpp : -----tatctcagatacttatgattccagccagatcatttctttcgtttaa : 315
787
788 Alga1_Alpp : ----- : -
789 Alga2_Alpp : gacttaaaagt-----ttgacttcaatcattgataagaactaataattcaagt : 364
790 Alga3_Alpp : gacttaaaagt-----ttgacttcaatcattgataagaactaataattcaagt : 365
791 Alga4_Alpp : gacttaaaagt-----ttgacttcaatcattgataagaactaataattcaagt : 365
792 Alga6_Alpp : ----- : -
793 Alga7_Alpp : ----- : -
794 Alga8_Alpp : gacttaaaagt-----ttgacttcaatcattgataagaactaataattcaagt : 365
795 Alga0_Alpp : gacttaaaagttgacttcaatcattgataagaactaataattcaagt : 390
796 Alha1_Alpp : gacttgaagtttgaatccctttctttttcaatcattgataagaactaataattcaagt : 377
797 Alha2_Alpp : gacttgaagtttgaatccctttctttttcaatcattgataagaactaataattcaagt : 377
798 Alha3_Alpp : gacttgaagtttgaatccctttctttttcaatcattgataagaactaataattcaagt : 379
799 Alha6_Alpp : gacttgaagtttgaatccctttctttttcaatcattgataagaactaataattcaagt : 375
800 Alha7_Alpp : gacttgaagtttgaatccctttctttttcaatcattgataagaactaataattcaagt : 381
801 Alha8_Alpp : gacttgaagtttgaatccctttctttttcaatcattgataagaactaataattcaagt : 374
802 Alha0_Alpp : gacttgaagtttgaatccctttctttttcaatcattgataagaactaataattcaagt : 404
803 Alni1_Alpp : gacttgaagtt-----cttacttcaatcattgataagaactaataattcaagt : 361
804 Alni2_Alpp : gacttgaagtt-----cttacttcaatcattgataagaactaataattcaagt : 362
805 Alni3_Alpp : gacttgaagtt-----cttacttcaatcattgataagaactaataattcaagt : 362
806 Alni4_Alpp : gacttgaagtt-----cttacttcaatcattgataagaactaataattcaagt : 362
807 Alni6_Alpp : gacttgaagtt-----cttacttcaatcattgataagaactaataattcaagt : 361
808 Alni7_Alpp : gacttgaagtt-----cttacttcaatcattgataagaactaataattcaagt : 362
809 Alni8_Alpp : gacttgaagtt-----cttacttcaatcattgataagaactaataattcaagt : 364
810 Alni0_Alpp : gacttgaagtt-----cttacttcaatcattgataagaactaataattcaagt : 389
811 Alof1_Alpp : gacttgaagtttgaatccctttctttttcaatcattgataagaactaataattcaagt : 348
812 Alof2_Alpp : gacttgaagtttgaatccctttctttttcaatcattgataagaactaataattcaagt : 346
813 Alof3_Alpp : gacttgaagtttgaatccctttctttttcaatcattgataagaactaataattcaagt : 347
814 Alof4_Alpp : gacttgaagtttgaatccctttctttttcaatcattgataagaactaataattcaagt : 347
815 Alof6_Alpp : gacttgaagtttgaatccctttctttttcaatcattgataagaactaataattcaagt : 346
816 Alof7_Alpp : gacttgaagtttgaatccctttctttttcaatcattgataagaactaataattcaagt : 349
817 Alof8_Alpp : gacttgaagtttgaatccctttctttttcaatcattgataagaactaataattcaagt : 348
818 Alof0_Alpp : gacttgaagtttgaatccctttctttttcaatcattgataagaactaataattcaagt : 375
819 Alox1_Alpp : gacttgaagtttgaatccctttctttttcaatcattgataagaactaataattcaagt : 347
820 Alox2_Alpp : gacttgaagtttgaatccctttctttttcaatcattgataagaactaataattcaagt : 350
821 Alox3_Alpp : gacttgaagtttgaatccctttctttttcaatcattgataagaactaataattcaagt : 348
822 Alox6_Alpp : gacttgaagtttgaatccctttctttttcaatcattgataagaactaataattcaagt : 349
823 Alox7_Alpp : gacttgaagtttgaatccctttctttttcaatcattgataagaactaataattcaagt : 349
824 Alox0_Alpp : gacttgaagtttgaatccctttctttttcaatcattgataagaactaataattcaagt : 375
825
826 Alga1_Alpp : ----- : -
827 Alga2_Alpp : ttcaatcaaattagtcattttgactgactggtttttacgttagatgataagtaaaaaagcag : 424
828 Alga3_Alpp : ttcaatcaaattagtcattttgactgactggtttttacgttagatgataagtaaaaaagcag : 425
829 Alga4_Alpp : ttcaatcaaattagtcattttgactgactggtttttacgttagatgataagtaaaaaagcag : 425
830 Alga6_Alpp : ----- : -
831 Alga7_Alpp : ----- : -
832 Alga8_Alpp : ttcaatcaaattagtcattttgactgactggtttttacgttagatgataagtaaaaaagcag : 425
833 Alga0_Alpp : ttcaatcaaattagtcattttgactgactggtttttacgttagatgataagtaaaaaagcag : 450
834 Alha1_Alpp : ttcaatcaaattagtcattttgactgactggtttttacgttagatgataagtaaaaaagcag : 437
835 Alha2_Alpp : ttcaatcaaattagtcattttgactgactggtttttacgttagatgataagtaaaaaagcag : 437
836 Alha3_Alpp : ttcaatcaaattagtcattttgactgactggtttttacgttagatgataagtaaaaaagcag : 439
837 Alha6_Alpp : ttcaatcaaattagtcattttgactgactggtttttacgttagatgataagtaaaaaagcag : 435

```

838 Alha7\_Alpp : ttcaatcaaattagtcattttgactgactggtttttacgtagatgataagtaaaaaagcag : 441  
839 Alha8\_Alpp : ttcaatcaaattagtcattttgactgactggtttttacgtagatgataagtaaaaaagcag : 434  
840 Alha0\_Alpp : ttcaatcaaattagtcattttgactgactggtttttacgtagatgataagtaaaaaagcag : 464  
841 Alni1\_Alpp : ttcaatcaaattagtcattttgactgactggtttttacgtagatgataagtaaaaaagcag : 421  
842 Alni2\_Alpp : ttcaatcaaattagtcattttgactgactggtttttacgtagatgataagtaaaaaagcag : 422  
843 Alni3\_Alpp : ttcaatcaaattagtcattttgactgactggtttttacgtagatgataagtaaaaaagcag : 422  
844 Alni4\_Alpp : ttcaatcaaattagtcattttgactgactggtttttacgtagatgataagtaaaaaagcag : 422  
845 Alni6\_Alpp : ttcaatcgaclgactgattttgactgactgatttttaaaatgataaggaaCaaagcag : 421  
846 Alni7\_Alpp : ttcaatcaaattagtcattttgactgactggtttttacgtagatgataagtaaaaaagcag : 422  
847 Alni8\_Alpp : ttcaatcaaattagtcattttgactgactggtttttacgtagatgataagtaaaaaagcag : 424  
848 Alni0\_Alpp : ttcaatcaaattagtcattttgactgactggtttttacgtagatgataagtaaaaaagcag : 449  
849 Alof1\_Alpp : ttcaatcaaattagtcattttgactgactggtttttacgtagatgataagtaaaaaagcag : 408  
850 Alof2\_Alpp : ttcaatcaaattagtcattttgactgactggtttttacgtagatgataagtaaaaaagcag : 406  
851 Alof3\_Alpp : ttcaatcaaattagtcattttgactgactggtttttacgtagatgataagtaaaaaagcag : 407  
852 Alof4\_Alpp : ttcaatcaaattagtcattttgactgactggtttttacgtagatgataagtaaaaaagcag : 407  
853 Alof6\_Alpp : ttcaatcaaattagtcattttgactgactggtttttacgtagatgataagtaaaaaagcag : 406  
854 Alof7\_Alpp : ttcaatcaaattagtcattttgactgactggtttttacgtagatgataagtaaaaaagcag : 409  
855 Alof8\_Alpp : ttcaatcaaattagtcattttgactgactggtttttacgtagatgataagtaaaaaagcag : 408  
856 Alof0\_Alpp : ttcaatcaaattagtcattttgactgactggtttttacgtagatgataagtaaaaaagcag : 435  
857 Alox1\_Alpp : ttcaatcaaattagtcattttgactgactggtttttacgtagatgataagtaaaaaagcag : 407  
858 Alox2\_Alpp : ttcaatcaaattagtcattttgactgactggtttttacgtagatgataagtaaaaaagcag : 410  
859 Alox3\_Alpp : ttcaatcaaattagtcattttgactgactggtttttacgtagatgataagtaaaaaagcag : 408  
860 Alox6\_Alpp : ttcaatcaaattagtcattttgactgactggtttttacgtagatgataagtaaaaaagcag : 409  
861 Alox7\_Alpp : ttcaatcaaattagtcattttgactgactggtttttacgtagatgataagtaaaaaagcag : 409  
862 Alox0\_Alpp : ttcaatcaaattagtcattttgactgactggtttttacgtagatgataagtaaaaaagcag : 435  
863  
864 Alga1\_Alpp : ----- : -  
865 Alga2\_Alpp : taggaactagaatgaa-cagtgcagta-- : 450  
866 Alga3\_Alpp : taggaactagaatgaa-cagtgcagta-- : 451  
867 Alga4\_Alpp : taggaactagaatgaa-cagtgcagta-- : 452  
868 Alga6\_Alpp : ----- : -  
869 Alga7\_Alpp : ----- : -  
870 Alga8\_Alpp : taggaactagaatgaa-cagtgcagta-- : 451  
871 Alga0\_Alpp : taggaactagaatgaa-cagtgcagta-- : 475  
872 Alha1\_Alpp : taggaactagaatgaa-cagtgcagta-- : 463  
873 Alha2\_Alpp : taggaactagaatgaa-cagtgcagta-- : 463  
874 Alha3\_Alpp : taggaactagaatgaa-cagtgcagta-- : 465  
875 Alha6\_Alpp : taggaactagaatgaa-cagtgcagta-- : 460  
876 Alha7\_Alpp : taggaactagaatgaa-cagtgcagta-- : 467  
877 Alha8\_Alpp : taggaactagaatgaa-cagtgcagta-- : 460  
878 Alha0\_Alpp : taggaactagaatgaa-cagtgcagta-- : 489  
879 Alni1\_Alpp : taggaactagaatgaa-cagtgcagta-- : 447  
880 Alni2\_Alpp : taggaactagaatgaa-cagtgcagtaaa : 450  
881 Alni3\_Alpp : taggaactagaatgaa-cagtgcagta-- : 448  
882 Alni4\_Alpp : taggaactagaatgaa-cagtgcagta-- : 448  
883 Alni6\_Alpp : aacgaactagaatgaa-cagtgcagta-- : 447  
884 Alni7\_Alpp : taggaactagaatgaa-cagtgcagta-- : 448  
885 Alni8\_Alpp : taggaactagaatgaa-cagtgcagta-- : 450  
886 Alni0\_Alpp : taggaactagaatgaa-cagtgcagta-- : 474  
887 Alof1\_Alpp : taggaactagaatgaa-cagtgcagta-- : 434  
888 Alof2\_Alpp : taggaactagaatgaa-cagtgcagta-- : 431  
889 Alof3\_Alpp : taggaactagaatgaa-cagtgcagta-- : 433  
890 Alof4\_Alpp : taggaactagaatgaa-cagtgcagta-- : 432  
891 Alof6\_Alpp : taggaactagaatgaa-cagtgcagta-- : 432  
892 Alof7\_Alpp : taggaactagaatgaa-cagtgcagta-- : 435  
893 Alof8\_Alpp : taggaactagaatgaa-cagtgcagta-- : 435  
894 Alof0\_Alpp : taggaactagaatgaa-cagtgcagta-- : 460  
895 Alox1\_Alpp : taggaactagaatgaa-cagtgcagta-- : 433  
896 Alox2\_Alpp : taggaactagaatgaa-cagtgcagta-- : 436  
897 Alox3\_Alpp : taggaactagaatgaa-cagtgcagta-- : 433  
898 Alox6\_Alpp : taggaactagaatgaa-cagtgcagta-- : 435  
899 Alox7\_Alpp : taggaactagaatgaa-cagtgcagta-- : 435  
900 Alox0\_Alpp : taggaactagaatgaa-cagtgcagta-- : 460



901

902 **Figure S14. The alignment of amplicons produced by designed Alpr primers.**

903 The ID of each sequence is shown on the left side of each panel. The ID is the concatenation of  
904 species name, plant individual id, and primer name. The rightmost number in each column represents  
905 the position of the base at that position in the amplicon. The SNPs and Indel are shown in red  
906 squares. The nucleotides identical across all plastomes are shaded in black, whereas those  
907 conserved in 60% of the sequences are shaded in gray. *Alpinia galanga*: Alga; *A. hainanensis*: Alha;  
908 *A. nigra*: Alni; *A. officinarum*: Alof; *A. oxyphylla*: Alox. Arabic numerals represent different individuals.

```

910 Alga1_Alpr : ggggg-----tgagagagataactt-aa : 21
911 Alga2_Alpr : c-ggg-----atagagagataactt-a : 19
912 Alga3_Alpr : g-ggg-----gaagagagataactt-a : 19
913 Alga4_Alpr : t-gac-----gcaagagataactt-a : 19
914 Alga6_Alpr : cgggg-----cgagagagataactt-a : 20
915 Alga7_Alpr : aggaa-----taaggaggaagataactt-aa : 24
916 Alga8_Alpr : g-gga-----gagaagagataactt-a : 19
917 Alga0_Alpr : tagggagggttccgctaataatcatagcatagaaaagaagaagataactt-aa : 50
918 Alha1_Alpr : gggg-----tgagagagataactt-a : 17
919 Alha2_Alpr : gggg-----tcggagataactt-a : 17
920 Alha3_Alpr : gggg-----atgagagaaactt-a : 17
921 Alha6_Alpr : agg-----agagagtctt-a : 14
922 Alha7_Alpr : aggg-----atgagagtctt-a : 17
923 Alha8_Alpr : cgga-----ggagagtctt-a : 15
924 Alha0_Alpr : tagggagggttccgctaataatcatagcataga----aagaagataactt-aa : 45
925 Alni1_Alpr : gcggt-----gagaagagataactt-a : 20
926 Alni3_Alpr : -agga-----gagaagagataactt-a : 19
927 Alni3_Alpr : ggggc-----taggagagataactt-a : 20
928 Alni4_Alpr : --ggg-----cgagagagataactt-a : 18
929 Alni6_Alpr : --ggg-----ctagagagataactt-a : 18
930 Alni7_Alpr : tgggc-----gaagaagagataactt-aa : 22
931 Alni8_Alpr : cgggg-----ctgagagagataactt-a : 21
932 Alni0_Alpr : tagggagggttccgctaataatcatagcatagaaaagaagaagataactt-aa : 50
933 Alof1_Alpr : ggacg-----aagagaactt-a : 16
934 Alof2_Alpr : agatt-----aaagaggaactt-a : 18
935 Alof3_Alpr : aggat-----aagaggtctt-a : 16
936 Alof4_Alpr : gggac-----tgaggagaactt-aa : 19
937 Alof5_Alpr : ggggc-----taggagaactt-a : 17
938 Alof6_Alpr : aggac-----gaggagaactt-a : 17
939 Alof7_Alpr : cgggg-----tagagaactt-aa : 17
940 Alof8_Alpr : gtgga-----cgagagaactt-a : 17
941 Alof0_Alpr : tagggagggttccgctaataatcatagcataga----aagaagataactt-aa : 45
942 Alox1_Alpr : ggggc-----gagaagaactt-a : 17
943 Alox2_Alpr : ggggc-----gaggagaactt-a : 17
944 Alox6_Alpr : gtgga-----tagagatctt-a : 16
945 Alox7_Alpr : gggaa-----taaggaggaactt-a : 19
946 Alox0_Alpr : tagggagggttccgctaataatcatagcataga----aagaagataactt-aa : 45
947
948 Alga1_Alpr : attaaataaaaataataaatttagtggatttaggataggaacaattgatag : 71
949 Alga2_Alpr : attaaataaaaataataaatttagtggatttaggataggaacaattgatag : 69
950 Alga3_Alpr : attaaataaaaataataaatttagtggatttaggataggaacaattgatag : 69
951 Alga4_Alpr : attaaataaaaataataaatttagtggatttaggataggaacaattgatag : 69
952 Alga6_Alpr : attaaataaaaataataaatttagtggatttaggataggaacaattgatag : 70
953 Alga7_Alpr : attaaataaaaataataaatttagtggatttaggataggaacaattgatag : 74
954 Alga8_Alpr : attaaataaaaataataaatttagtggatttaggataggaacaattgatag : 69
955 Alga0_Alpr : attaaataaaaataataaatttagtggatttaggataggaacaattgatag : 100
956 Alha1_Alpr : a-ttaataaaaataataaatttagtggatttaggataggaacaattgatag : 66
957 Alha2_Alpr : a-ttaataaaaataataaatttagtggatttaggataggaacaattgatag : 66
958 Alha3_Alpr : a-ttaataaaaataataaatttagtggatttaggataggaacaattgatag : 66
959 Alha6_Alpr : a-ttaataaaaataataaatttagtggatttaggataggaacaattgatag : 63
960 Alha7_Alpr : a-ttaataaaaataataaatttagtggatttaggataggaacaattgatag : 66
961 Alha8_Alpr : a-ttaataaaaataataaatttagtggatttaggataggaacaattgatag : 64
962 Alha0_Alpr : attaaataaaaataataaatttagtggatttaggataggaacaattgatag : 95
963 Alni1_Alpr : attaaataaaaataataaatttagtggatttaggataggaacaattgatag : 70
964 Alni3_Alpr : attaaataaaaataataaatttagtggatttaggataggaacaattgatag : 69
965 Alni3_Alpr : attaaataaaaataataaatttagtggatttaggataggaacaattgatag : 70
966 Alni4_Alpr : attaaataaaaataataaatttagtggatttaggataggaacaattgatag : 68
967 Alni6_Alpr : attaaataaaaataataaatttagtggatttaggataggaacaattgatag : 68
968 Alni7_Alpr : attaaataaaaataataaatttagtggatttaggataggaacaattgatag : 72
969 Alni8_Alpr : attaaataaaaataataaatttagtggatttaggataggaacaattgatag : 71

```

```

970 Alni0_Alpr : attaaataaaataataaatttagtggatttaggataggaacaattgatag : 100
971 Alof1_Alpr : a-ttaataaaa-----tagtggatttaggataggaacaattgatag : 55
972 Alof2_Alpr : a-ttaataaaa-----tagtggatttaggataggaacaattgatag : 57
973 Alof3_Alpr : a-ttaataaaa-----tagtggatttaggataggaacaattgatag : 55
974 Alof4_Alpr : a-ttaataaaa-----tagtggatttaggataggaacaattgatag : 58
975 Alof5_Alpr : a-ttaataaaa-----tagtggatttaggataggaacaattgatag : 56
976 Alof6_Alpr : a-ttaataaaa-----tagtggatttaggataggaacaattgatag : 56
977 Alof7_Alpr : attaaataaaa-----tagtggatttaggataggaacaattgatag : 57
978 Alof8_Alpr : a-ttaataaaa-----tagtggatttaggataggaacaattgatag : 56
979 Alof0_Alpr : attaaataaaa-----tagtggatttaggataggaacaattgatag : 85
980 Alox1_Alpr : a-ttaataaaa-----tagtggatttaggataggaacaattgatag : 56
981 Alox2_Alpr : a-ttaataaaa-----tagtggatttaggataggaacaattgatag : 56
982 Alox6_Alpr : a-ttaataaaa-----tagtggatttaggataggaacaattgatag : 55
983 Alox7_Alpr : a-ttaataaaa-----tagtggatttaggataggaacaattgatag : 58
984 Alox0_Alpr : attaaataaaa-----tagtggatttaggataggaacaattgatag : 85
985
986 Alga1_Alpr : ttagaaggaatttgatttcttaattattacttcataaaattattat : 121
987 Alga2_Alpr : ttagaaggaatttgatttcttaattattacttcataaaattattat : 119
988 Alga3_Alpr : ttagaaggaatttgatttcttaattattacttcataaaattattat : 119
989 Alga4_Alpr : ttagaaggaatttgatttcttaattattacttcataaaattattat : 119
990 Alga6_Alpr : ttagaaggaatttgatttcttaattattacttcataaaattattat : 120
991 Alga7_Alpr : ttagaaggaatttgatttcttaattattacttcataaaattattat : 124
992 Alga8_Alpr : ttagaaggaatttgatttcttaattattacttcataaaattattat : 119
993 Alga0_Alpr : ttagaaggaatttgatttcttaattattacttcataaaattattat : 150
994 Alha1_Alpr : ttagaaggaatttgatttcttaattattacttcataaaattattat : 116
995 Alha2_Alpr : ttagaaggaatttgatttcttaattattacttcataaaattattat : 116
996 Alha3_Alpr : ttagaaggaatttgatttcttaattattacttcataaaattattat : 116
997 Alha6_Alpr : ttagaaggaatttgatttcttaattattacttcataaaattattat : 113
998 Alha7_Alpr : ttagaaggaatttgatttcttaattattacttcataaaattattat : 116
999 Alha8_Alpr : ttagaaggaatttgatttcttaattattacttcataaaattattat : 114
1000 Alha0_Alpr : ttagaaggaatttgatttcttaattattacttcataaaattattat : 145
1001 Alni1_Alpr : ttagaaggaatttgatttcttaattattacttcataaaattattat : 120
1002 Alni3_Alpr : ttagaaggaatttgatttcttaattattacttcataaaattattat : 119
1003 Alni3_Alpr : ttagaaggaatttgatttcttaattattacttcataaaattattat : 120
1004 Alni4_Alpr : ttagaaggaatttgatttcttaattattacttcataaaattattat : 118
1005 Alni6_Alpr : ttagaaggaatttgatttcttaattattacttcataaaattattat : 118
1006 Alni7_Alpr : ttagaaggaatttgatttcttaattattacttcataaaattattat : 122
1007 Alni8_Alpr : ttagaaggaatttgatttcttaattattacttcataaaattattat : 121
1008 Alni0_Alpr : ttagaaggaatttgatttcttaattattacttcataaaattattat : 150
1009 Alof1_Alpr : ttagaaggaatttgatttcttaattattacttcataaaattattat : 105
1010 Alof2_Alpr : ttagaaggaatttgatttcttaattattacttcataaaattattat : 107
1011 Alof3_Alpr : ttagaaggaatttgatttcttaattattacttcataaaattattat : 105
1012 Alof4_Alpr : ttagaaggaatttgatttcttaattattacttcataaaattattat : 108
1013 Alof5_Alpr : ttagaaggaatttgatttcttaattattacttcataaaattattat : 106
1014 Alof6_Alpr : ttagaaggaatttgatttcttaattattacttcataaaattattat : 106
1015 Alof7_Alpr : ttagaaggaatttgatttcttaattattacttcataaaattattat : 107
1016 Alof8_Alpr : ttagaaggaatttgatttcttaattattacttcataaaattattat : 106
1017 Alof0_Alpr : ttagaaggaatttgatttcttaattattacttcataaaattattat : 135
1018 Alox1_Alpr : ttagaaggaatttgatttcttaattattacttcataaaattattat : 106
1019 Alox2_Alpr : ttagaaggaatttgatttcttaattattacttcataaaattattat : 106
1020 Alox6_Alpr : ttagaaggaatttgatttcttaattattacttcataaaattattat : 105
1021 Alox7_Alpr : ttagaaggaatttgatttcttaattattacttcataaaattattat : 108
1022 Alox0_Alpr : ttagaaggaatttgatttcttaattattacttcataaaattattat : 135
1023
1024 Alga1_Alpr : attactctatatctatat----- : 139
1025 Alga2_Alpr : attactctatatctatat----- : 137
1026 Alga3_Alpr : attactctatatctatat----- : 137
1027 Alga4_Alpr : attactctatatctatat----- : 137
1028 Alga6_Alpr : attactctatatctatat----- : 138
1029 Alga7_Alpr : attactctatatctatat----- : 142
1030 Alga8_Alpr : attactctatatctatat----- : 137
1031 Alga0_Alpr : attactctatatctatat----- : 168
1032 Alha1_Alpr : attactctatatctatat----- : 134
1033 Alha2_Alpr : attactctatatctatat----- : 134
1034 Alha3_Alpr : attactctatatctatat----- : 134
1035 Alha6_Alpr : attactctatatctatat----- : 131
1036 Alha7_Alpr : attactctatatctatat----- : 134
1037 Alha8_Alpr : attactctatatctatat----- : 132
1038 Alha0_Alpr : attactctatatctatat----- : 163
1039 Alni1_Alpr : attactctatatctatat----- : 138
1040 Alni3_Alpr : attactctatatctatat----- : 137
1041 Alni3_Alpr : attactctatatctatat----- : 138

```

```

1042 Alni4_Alpr : attactctatatctatat----- : 136
1043 Alni6_Alpr : attactctatatctatat----- : 136
1044 Alni7_Alpr : attactctatatctatat----- : 140
1045 Alni8_Alpr : attactctatatctatat----- : 139
1046 Alni0_Alpr : attactctatatctatatatctataaaatataaaggtaaatttttactc : 200
1047 Alof1_Alpr : attactctatatctatat----- : 123
1048 Alof2_Alpr : attactctatatctatat----- : 125
1049 Alof3_Alpr : attactctatatctatat----- : 123
1050 Alof4_Alpr : attactctatatctatat----- : 126
1051 Alof5_Alpr : attactctatatctatat----- : 124
1052 Alof6_Alpr : attactctatatctatat----- : 124
1053 Alof7_Alpr : attactctatatctatat----- : 125
1054 Alof8_Alpr : attactctatatctatat----- : 124
1055 Alof0_Alpr : attactctatatctatat----- : 153
1056 Alox1_Alpr : attactctatatctatat----- : 124
1057 Alox2_Alpr : attactctatatctatat----- : 124
1058 Alox6_Alpr : attactctatatctatat----- : 123
1059 Alox7_Alpr : attactctatatctatat----- : 126
1060 Alox0_Alpr : attactctatatctatat----- : 153
1061
1062 Alga1_Alpr : -----atctataaaatataaaaggtaaaatttttacttaa : 173
1063 Alga2_Alpr : -----atctataaaatataaaaggtaaaatttttacttaa : 171
1064 Alga3_Alpr : -----atctataaaatataaaaggtaaaatttttacttaa : 171
1065 Alga4_Alpr : -----atctataaaatataaaaggtaaaatttttacttaa : 171
1066 Alga6_Alpr : -----atctataaaatataaaaggtaaaatttttacttaa : 172
1067 Alga7_Alpr : -----atctataaaatataaaaggtaaaatttttacttaa : 176
1068 Alga8_Alpr : -----atctataaaatataaaaggtaaaatttttacttaa : 171
1069 Alga0_Alpr : -----atctataaaatataaaaggtaaaatttttacttaa : 202
1070 Alha1_Alpr : -----atctataaaatataaaaggtaaaatttttacttaa : 168
1071 Alha2_Alpr : -----atctataaaatataaaaggtaaaatttttacttaa : 168
1072 Alha3_Alpr : -----atctataaaatataaaaggtaaaatttttacttaa : 168
1073 Alha6_Alpr : -----atctataaaatataaaaggtaaaatttttacttaa : 165
1074 Alha7_Alpr : -----atctataaaatataaaaggtaaaatttttacttaa : 168
1075 Alha8_Alpr : -----atctataaaatataaaaggtaaaatttttacttaa : 166
1076 Alha0_Alpr : -----atctataaaatataaaaggtaaaatttttacttaa : 197
1077 Alni1_Alpr : -----atctataaaatataaaaggtaaaatttttacttaa : 172
1078 Alni3_Alpr : -----atctataaaatataaaaggtaaaatttttacttaa : 171
1079 Alni3_Alpr : -----atctataaaatataaaaggtaaaatttttacttaa : 172
1080 Alni4_Alpr : -----atctataaaatataaaaggtaaaatttttacttaa : 170
1081 Alni6_Alpr : -----atctataaaatataaaaggtaaaatttttacttaa : 170
1082 Alni7_Alpr : -----atctataaaatataaaaggtaaaatttttacttaa : 174
1083 Alni8_Alpr : -----atctataaaatataaaaggtaaaatttttacttaa : 173
1084 Alni0_Alpr : taaatcttaatctataaaatataaaaggtaaaatttttacttaa : 243
1085 Alof1_Alpr : -----atctataaaatataaaaggtaaaatttttacttaa : 164
1086 Alof2_Alpr : -----atctataaaatataaaaggtaaaatttttacttaa : 166
1087 Alof3_Alpr : -----atctataaaatataaaaggtaaaatttttacttaa : 164
1088 Alof4_Alpr : -----atctataaaatataaaaggtaaaatttttacttaa : 167
1089 Alof5_Alpr : -----atctataaaatataaaaggtaaaatttttacttaa : 165
1090 Alof6_Alpr : -----atctataaaatataaaaggtaaaatttttacttaa : 165
1091 Alof7_Alpr : -----atctataaaatataaaaggtaaaatttttacttaa : 166
1092 Alof8_Alpr : -----atctataaaatataaaaggtaaaatttttacttaa : 165
1093 Alof0_Alpr : -----atctataaaatataaaaggtaaaatttttacttaa : 194
1094 Alox1_Alpr : -----atctataaaatataaaaggtaaaatttttacttaa : 158
1095 Alox2_Alpr : -----atctataaaatataaaaggtaaaatttttacttaa : 158
1096 Alox6_Alpr : -----atctataaaatataaaaggtaaaatttttacttaa : 157
1097 Alox7_Alpr : -----atctataaaatataaaaggtaaaatttttacttaa : 160
1098 Alox0_Alpr : -----atctataaaatataaaaggtaaaatttttacttaa : 187
1099
1100 Alga1_Alpr : tctta----attacattaat-----attaatt : 196
1101 Alga2_Alpr : tctta----attacattaat-----attaatt : 194
1102 Alga3_Alpr : tctta----attacattaat-----attaatt : 194
1103 Alga4_Alpr : tctta----attacattaat-----attaatt : 194
1104 Alga6_Alpr : tctta----attacattaat-----attaatt : 195
1105 Alga7_Alpr : tctta----attacattaat-----attaatt : 199
1106 Alga8_Alpr : tctta----attacattaat-----attaatt : 194
1107 Alga0_Alpr : tctta----attacattaatctttattatcttaattacattaattaatt : 246
1108 Alha1_Alpr : tctta----attacattaa-----t : 184
1109 Alha2_Alpr : tctta----attacattaa-----t : 184
1110 Alha3_Alpr : tctta----attacattaa-----t : 184
1111 Alha6_Alpr : tctta----attacattaa-----t : 181
1112 Alha7_Alpr : tctta----attacattaa-----t : 184
1113 Alha8_Alpr : tctta----attacattaa-----t : 182

```

1114 Alha0\_Alpr : -tctta-----attacattaa-----t : 213  
1115 Alni1\_Alpr : -tcttaattacattacattaa-----attaatt : 200  
1116 Alni3\_Alpr : -tcttaattacattacattaa-----attaatt : 199  
1117 Alni3\_Alpr : -tcttaattacattacattaa-----attaatt : 200  
1118 Alni4\_Alpr : -tcttaattacattacattaa-----attaatt : 198  
1119 Alni6\_Alpr : -tcttaattacattacattaa-----attaatt : 198  
1120 Alni7\_Alpr : -tcttaattacattacattaa-----attaatt : 202  
1121 Alni8\_Alpr : -tcttaattacattacattaa-----attaatt : 201  
1122 Alni0\_Alpr : -tcttaattacattacattaa-----attaatt : 271  
1123 Aloh1\_Alpr : ttcttaattacattacattaa-----t : 186  
1124 Aloh2\_Alpr : ttcttaattacgttacattaa-----t : 188  
1125 Aloh3\_Alpr : ttcttaattacattacattaa-----t : 186  
1126 Aloh4\_Alpr : ttcttaattacattacattaa-----t : 189  
1127 Aloh5\_Alpr : ttcttaattacattacattaa-----t : 187  
1128 Aloh6\_Alpr : ttcttaattacattacattaa-----t : 187  
1129 Aloh7\_Alpr : ttcttaattacattacattaa-----t : 188  
1130 Aloh8\_Alpr : ttcttaattacattacattaa-----t : 187  
1131 Aloh0\_Alpr : ttcttaattacattacattaa-----t : 216  
1132 Alox1\_Alpr : -tcttaattacattacattaa-----attaatt : 186  
1133 Alox2\_Alpr : -tcttaattacattacattaa-----attaatt : 186  
1134 Alox6\_Alpr : -tcttaattacattacattaa-----attaatt : 185  
1135 Alox7\_Alpr : -tcttaattacattacattaa-----attaatt : 188  
1136 Alox0\_Alpr : -tcttaattacattacattaa-----attaatt : 215  
1137  
1138 Alga1\_Alpr : attaattaagaattt---aat-----aaataagaatttaatgataatg : 236  
1139 Alga2\_Alpr : attaattaagaattt---aat-----aaataagaatttaatgataatg : 234  
1140 Alga3\_Alpr : attaattaagaattt---aat-----aaataagaatttaatgataatg : 234  
1141 Alga4\_Alpr : attaattaagaattt---aat-----aaataagaatttaatgataatg : 234  
1142 Alga6\_Alpr : attaattaagaattt---aat-----aaataagaatttaatgataatg : 235  
1143 Alga7\_Alpr : attaattaagaattt---aat-----aaataagaatttaatgataatg : 239  
1144 Alga8\_Alpr : attaattaagaattt---aat-----aaataagaatttaatgataatg : 234  
1145 Alga0\_Alpr : attaattaagaattt---aataaat-----aaataagaatttaatgataatg : 290  
1146 Alha1\_Alpr : attaattattaattt---aat-----aaataagaatt---tcatg : 218  
1147 Alha2\_Alpr : attaattattaattt---aat-----aaataagaatt---tcatg : 218  
1148 Alha3\_Alpr : attaattattaattt---aat-----aaataagaatt---tcatg : 218  
1149 Alha6\_Alpr : attaattattaattt---aat-----aaataagaatt---tcatg : 215  
1150 Alha7\_Alpr : attaattattaattt---aat-----aaataagaatt---tcatg : 218  
1151 Alha8\_Alpr : attaattattaattt---aat-----aaataagaatt---tcatg : 216  
1152 Alha0\_Alpr : attaattattaattt---aat-----aaataagaatt---tcatg : 247  
1153 Alni1\_Alpr : attaattaagaattt---aat-----aaataagaatt---taatg : 234  
1154 Alni3\_Alpr : attaattaagaattt---aat-----aaataagaatt---taatg : 233  
1155 Alni3\_Alpr : attaattaagaattt---aat-----aaataagaatt---taatg : 234  
1156 Alni4\_Alpr : attaattaagaattt---aat-----aaataagaatt---taatg : 232  
1157 Alni6\_Alpr : attaattaagaattt---aat-----aaataagaatt---taatg : 232  
1158 Alni7\_Alpr : attaattaagaattt---aat-----aaataagaatt---taatg : 236  
1159 Alni8\_Alpr : attaattaagaattt---aat-----aaataagaatt---taatg : 235  
1160 Alni0\_Alpr : attaattaagaattt---aat-----aaataagaatt---taatg : 305  
1161 Aloh1\_Alpr : attaattaataattt---aataaataaa---aaataagaatt---tcatg : 226  
1162 Aloh2\_Alpr : attaattaataattt---aataaataaa---aaataagaatt---tcatg : 228  
1163 Aloh3\_Alpr : attaattaataattt---aataaataaa---aaataagaatt---tcatg : 226  
1164 Aloh4\_Alpr : attaattaataattt---aataaataaa---aaataagaatt---tcatg : 229  
1165 Aloh5\_Alpr : attaattaataattt---aataaataaa---aaataagaatt---tcatg : 227  
1166 Aloh6\_Alpr : attaattaataattt---aataaataaa---aaataagaatt---tcatg : 227  
1167 Aloh7\_Alpr : attaattaataattt---aataaataaa---aaataagaatt---tcatg : 228  
1168 Aloh8\_Alpr : attaattaataattt---aataaataaa---aaataagaatt---tcatg : 227  
1169 Aloh0\_Alpr : attaattaataattt---aataaataaa---aaataagaatt---tcatg : 256  
1170 Alox1\_Alpr : attaattaataattt---aataaataaa---aaataagaatt---tcatg : 226  
1171 Alox2\_Alpr : attaattaataattt---aataaataaa---aaataagaatt---tcatg : 226  
1172 Alox6\_Alpr : attaattaataattt---aataaataaa---aaataagaatt---tcatg : 225  
1173 Alox7\_Alpr : attaattaataattt---aataaataaa---aaataagaatt---tcatg : 228  
1174 Alox0\_Alpr : attaattaataattt---aataaataaa---aaataagaatt---tcatg : 255  
1175  
1176 Alga1\_Alpr : ataattgcaacgaaatttttat---aaaaattctatttctagtttagtcactttt : 286  
1177 Alga2\_Alpr : ataattgcaacgaaatttttat---aaaaattctatttctagtttagtcactttt : 284  
1178 Alga3\_Alpr : ataattgcaacgaaatttttat---aaaaattctatttctagtttagtcactttt : 284  
1179 Alga4\_Alpr : ataattgcaacgaaatttttat---aaaaattctatttctagtttagtcactttt : 284  
1180 Alga6\_Alpr : ataattgcaacgaaatttttat---aaaaattctatttctagtttagtcactttt : 285  
1181 Alga7\_Alpr : ataattgcaacgaaatttttat---aaaaattctatttctagtttagtcactttt : 289  
1182 Alga8\_Alpr : ataattgcaacgaaatttttat---aaaaattctatttctagtttagtcactttt : 284  
1183 Alga0\_Alpr : ataattgcaacgaaatttttat---aaaaattctatttctagtttagtcactttt : 340  
1184 Alha1\_Alpr : ataattgcaacgaaatttttag---aaaaattctatttctagtttagtcactttt : 268  
1185 Alha2\_Alpr : ataattgcaacgaaatttttag---aaaaattctatttctagtttagtcactttt : 268

1186 Alha3\_Alpr : ataattgcaacgaaatTTTTAGAAAATTCATTTCTAGTTAGTCACCTTT : 268  
1187 Alha6\_Alpr : ataattgcaacgaaatTTTTAGAAAATTCATTTCTAGTTAGTCACCTTT : 265  
1188 Alha7\_Alpr : ataattgcaacgaaatTTTTAGAAAATTCATTTCTAGTTAGTCACCTTT : 268  
1189 Alha8\_Alpr : ataattgcaacgaaatTTTTAGAAAATTCATTTCTAGTTAGTCACCTTT : 266  
1190 Alha0\_Alpr : ataattgcaacgaaatTTTTAGAAAATTCATTTCTAGTTAGTCACCTTT : 297  
1191 Alni1\_Alpr : ataattgcaacgaaatTTTTAGAAAATTCATTTCTAGTTAGTCACCTTT : 284  
1192 Alni3\_Alpr : ataattgcaacgaaatTTTTAGAAAATTCATTTCTAGTTAGTCACCTTT : 283  
1193 Alni3\_Alpr : ataattgcaacgaaatTTTTAGAAAATTCATTTCTAGTTAGTCACCTTT : 284  
1194 Alni4\_Alpr : ataattgcaacgaaatTTTTAGAAAATTCATTTCTAGTTAGTCACCTTT : 282  
1195 Alni6\_Alpr : ataattgcaacgaaatTTTTAGAAAATTCATTTCTAGTTAGTCACCTTT : 282  
1196 Alni7\_Alpr : ataattgcaacgaaatTTTTAGAAAATTCATTTCTAGTTAGTCACCTTT : 286  
1197 Alni8\_Alpr : ataattgcaacgaaatTTTTAGAAAATTCATTTCTAGTTAGTCACCTTT : 285  
1198 Alni0\_Alpr : ataattgcaacgaaatTTTTAGAAAATTCATTTCTAGTTAGTCACCTTT : 355  
1199 Alof1\_Alpr : ataattgcaacgaaatTTTTAGAAAATTCATTTCTAGTTAGTCACCTTT : 276  
1200 Alof2\_Alpr : ataattgcaacgaaatTTTTAGAAAATTCATTTCTAGTTAGTCACCTTT : 278  
1201 Alof3\_Alpr : ataattgcaacgaaatTTTTAGAAAATTCATTTCTAGTTAGTCACCTTT : 276  
1202 Alof4\_Alpr : ataattgcaacgaaatTTTTAGAAAATTCATTTCTAGTTAGTCACCTTT : 279  
1203 Alof5\_Alpr : ataattgcaacgaaatTTTTAGAAAATTCATTTCTAGTTAGTCACCTTT : 277  
1204 Alof6\_Alpr : ataattgcaacgaaatTTTTAGAAAATTCATTTCTAGTTAGTCACCTTT : 277  
1205 Alof7\_Alpr : ataattgcaacgaaatTTTTAGAAAATTCATTTCTAGTTAGTCACCTTT : 278  
1206 Alof8\_Alpr : ataattgcaacgaaatTTTTAGAAAATTCATTTCTAGTTAGTCACCTTT : 277  
1207 Alof0\_Alpr : ataattgcaacgaaatTTTTAGAAAATTCATTTCTAGTTAGTCACCTTT : 306  
1208 Alox1\_Alpr : ataattgcaacgaaatTTTTAGAAAATTCATTTCTAGTTAGTCACCTTT : 276  
1209 Alox2\_Alpr : ataattgcaacgaaatTTTTAGAAAATTCATTTCTAGTTAGTCACCTTT : 276  
1210 Alox6\_Alpr : ataattgcaacgaaatTTTTAGAAAATTCATTTCTAGTTAGTCACCTTT : 275  
1211 Alox7\_Alpr : ataattgcaacgaaatTTTTAGAAAATTCATTTCTAGTTAGTCACCTTT : 278  
1212 Alox0\_Alpr : ataattgcaacgaaatTTTTAGAAAATTCATTTCTAGTTAGTCACCTTT : 305  
1213  
1214 Alga1\_Alpr : atttaatttattttttgTTTCTTCTTCTCAGCTCAGATCGAAAATATAA : 336  
1215 Alga2\_Alpr : atttaatttattttttgTTTCTTCTTCTCAGCTCAGATCGAAAATATAA : 334  
1216 Alga3\_Alpr : atttaatttattttttgTTTCTTCTTCTCAGCTCAGATCGAAAATATAA : 334  
1217 Alga4\_Alpr : atttaatttattttttgTTTCTTCTTCTCAGCTCAGATCGAAAATATAA : 334  
1218 Alga6\_Alpr : atttaatttattttttgTTTCTTCTTCTCAGCTCAGATCGAAAATATAA : 335  
1219 Alga7\_Alpr : atttaatttattttttgTTTCTTCTTCTCAGCTCAGATCGAAAATATAA : 339  
1220 Alga8\_Alpr : atttaatttattttttgTTTCTTCTTCTCAGCTCAGATCGAAAATATAA : 334  
1221 Alga0\_Alpr : atttaatttattttttgTTTCTTCTTCTCAGCTCAGATCGAAAATATAA : 390  
1222 Alha1\_Alpr : atttcatttattttttgTTTCTTCTTCTCAGCTCAGATCGAAAATATAA : 318  
1223 Alha2\_Alpr : atttcatttattttttgTTTCTTCTTCTCAGCTCAGATCGAAAATATAA : 318  
1224 Alha3\_Alpr : atttcatttattttttgTTTCTTCTTCTCAGCTCAGATCGAAAATATAA : 318  
1225 Alha6\_Alpr : atttcatttattttttgTTTCTTCTTCTCAGCTCAGATCGAAAATATAA : 315  
1226 Alha7\_Alpr : atttcatttattttttgTTTCTTCTTCTCAGCTCAGATCGAAAATATAA : 318  
1227 Alha8\_Alpr : atttcatttattttttgTTTCTTCTTCTCAGCTCAGATCGAAAATATAA : 316  
1228 Alha0\_Alpr : atttcatttattttttgTTTCTTCTTCTCAGCTCAGATCGAAAATATAA : 347  
1229 Alni1\_Alpr : atttaatttattttttgTTTCTTCTTCTCAGCTCAGATCGAAAATATAA : 334  
1230 Alni3\_Alpr : atttaatttattttttgTTTCTTCTTCTCAGCTCAGATCGAAAATATAA : 333  
1231 Alni3\_Alpr : atttaatttattttttgTTTCTTCTTCTCAGCTCAGATCGAAAATATAA : 334  
1232 Alni4\_Alpr : atttaatttattttttgTTTCTTCTTCTCAGCTCAGATCGAAAATATAA : 332  
1233 Alni6\_Alpr : atttaatttattttttgTTTCTTCTTCTCAGCTCAGATCGAAAATATAA : 332  
1234 Alni7\_Alpr : atttaatttattttttgTTTCTTCTTCTCAGCTCAGATCGAAAATATAA : 336  
1235 Alni8\_Alpr : atttaatttattttttgTTTCTTCTTCTCAGCTCAGATCGAAAATATAA : 335  
1236 Alni0\_Alpr : atttaatttattttttgTTTCTTCTTCTCAGCTCAGATCGAAAATATAA : 405  
1237 Alof1\_Alpr : atttcatttattttttgTTTCTTCTTCTCAGCTCAGATCGAAAATATAA : 326  
1238 Alof2\_Alpr : atttcatttattttttgTTTCTTCTTCTCAGCTCAGATCGAAAATATAA : 328  
1239 Alof3\_Alpr : atttcatttattttttgTTTCTTCTTCTCAGCTCAGATCGAAAATATAA : 326  
1240 Alof4\_Alpr : atttcatttattttttgTTTCTTCTTCTCAGCTCAGATCGAAAATATAA : 329  
1241 Alof5\_Alpr : atttcatttattttttgTTTCTTCTTCTCAGCTCAGATCGAAAATATAA : 327  
1242 Alof6\_Alpr : atttcatttattttttgTTTCTTCTTCTCAGCTCAGATCGAAAATATAA : 327  
1243 Alof7\_Alpr : atttcatttattttttgTTTCTTCTTCTCAGCTCAGATCGAAAATATAA : 328  
1244 Alof8\_Alpr : atttcatttattttttgTTTCTTCTTCTCAGCTCAGATCGAAAATATAA : 327  
1245 Alof0\_Alpr : atttcatttattttttgTTTCTTCTTCTCAGCTCAGATCGAAAATATAA : 356  
1246 Alox1\_Alpr : atttcatttattttttgTTTCTTCTTCTCAGCTCAGATCGAAAATATAA : 326  
1247 Alox2\_Alpr : atttcatttattttttgTTTCTTCTTCTCAGCTCAGATCGAAAATATAA : 326  
1248 Alox6\_Alpr : atttcatttattttttgTTTCTTCTTCTCAGCTCAGATCGAAAATATAA : 325  
1249 Alox7\_Alpr : atttcatttattttttgTTTCTTCTTCTCAGCTCAGATCGAAAATATAA : 328  
1250 Alox0\_Alpr : atttcatttattttttgTTTCTTCTTCTCAGCTCAGATCGAAAATATAA : 355  
1251  
1252 Alga1\_Alpr : gagttaagccgatacaaaat--gaaaagggggtttatggctaaggg-taa : 383  
1253 Alga2\_Alpr : gagttaagccgatacaaaat--gaaaagggggtttatggctaaggg-taa : 381  
1254 Alga3\_Alpr : gagttaagccgatacaaaat--gaaaagggggtttatggctaaggg-taa : 382  
1255 Alga4\_Alpr : gagttaagccgatacaaaat--gaaaagggggtttatggctaaggg-taa : 381  
1256 Alga6\_Alpr : gagttaagccgatacaaaat--gaaaagggggtttatggctaaggg-taa : 382  
1257 Alga7\_Alpr : gagttaagccgatacaaaat--gaaaagggggtttatggctaaggg-taa : 386

1258 Alga8\_Alpr : gagttaagccgatacaaaaat--gaaaagggggtttatggtaaggg-taa : 380  
1259 Alga0\_Alpr : gagttaagccgatacaaaaat--gaaaagggggtttatggctaaggg-taa : 437  
1260 Alha1\_Alpr : gagttaagccgatacaaaaat--ttaaagggggtttatggctaaggg-taa : 365  
1261 Alha2\_Alpr : ga----- : 320  
1262 Alha3\_Alpr : gagttaagccgatacaaaaat--ttaaagggggtttatggctaaggg-taa : 365  
1263 Alha6\_Alpr : gagttaagccgatacaaaaat--ttaaagggggtttatggctaaggg-taa : 363  
1264 Alha7\_Alpr : gagttaagccgatacaaaaat--ttaaagggggtttatggctaaggg-taa : 365  
1265 Alha8\_Alpr : gagttaagccgatacaaaaat--ttaaagggggtttatggctaaggg-taa : 363  
1266 Alha0\_Alpr : gagttaagccgatacaaaaat--ttaaagggggtttatggctaaggg-taa : 394  
1267 Alni1\_Alpr : gagttaagccgatacaaaaataaaaaagggggtttatggctaaggg-taa : 383  
1268 Alni3\_Alpr : gagttaagccgatacaaaaataaaaaagggggtttatggtaaggg-taa : 382  
1269 Alni3\_Alpr : gagttaagccgatacaaaaataaaaaagggggtttatggctaaggg-taa : 383  
1270 Alni4\_Alpr : gagttaagccgatacaaaaataaaaaagggggtttatggctaaggg-taa : 381  
1271 Alni6\_Alpr : gagttaagccgatacaaaaataaaaaagggggtttatggtaaggg-taa : 381  
1272 Alni7\_Alpr : gagttaagccgatacaaaaataaaaaagggggtttatggctaaggg-taa : 385  
1273 Alni8\_Alpr : gagttaagccgatacaaaaataaaaaagggggtttatggctaaggg-taa : 384  
1274 Alni0\_Alpr : gagttaagccgatacaaaaataaaaaagggggtttatggctaaggg-taa : 454  
1275 Alof1\_Alpr : gagttaagccgatacaaaaat--taaaagggggtttatggctaaggg-taa : 373  
1276 Alof2\_Alpr : gagttaagccgatacaaaaat--taaaagggggtttatggctaaggg-taa : 376  
1277 Alof3\_Alpr : gagttaagccgatacaaaaat--taaaagggggtttatggctaaggg-taa : 373  
1278 Alof4\_Alpr : gagttaagccgatacaaaaat--taaaagggggtttatggctaaggg-taa : 376  
1279 Alof5\_Alpr : gagttaagccgatacaaaaat--taaaagggggtttatggctaaggg-taa : 374  
1280 Alof6\_Alpr : gagttaagccgatacaaaaat--taaaagggggtttatggctaaggg-taa : 374  
1281 Alof7\_Alpr : gagttaagccgatacaaaaat--taaaagggggtttatggtaaggg-taa : 375  
1282 Alof8\_Alpr : gagttaagccgatacaaaaat--taaaagggggtttatggctaaggg-taa : 374  
1283 Alof0\_Alpr : gagttaagccgatacaaaaat--taaaagggggtttatggctaaggg-taa : 403  
1284 Alox1\_Alpr : gagttaagccgatacaaaaat--ttaaagggggtttatggctaaggg-taa : 373  
1285 Alox2\_Alpr : gagttaagccgatacaaaaat--ttaaagggggtttatggctaaggg-taa : 373  
1286 Alox6\_Alpr : gagttaagccgatacaaaaat--ttaaagggggtttatggctaaggg-taa : 372  
1287 Alox7\_Alpr : gagttaagccgatacaaaaat--ttaaagggggtttatggctaaggg-taa : 375  
1288 Alox0\_Alpr : gagttaagccgatacaaaaat--ttaaagggggtttatggctaaggg-taa : 402  
1289  
1290 Alga1\_Alpr : ga----- : 385  
1291 Alga2\_Alpr : ga----- : 383  
1292 Alga3\_Alpr : ga----- : 384  
1293 Alga4\_Alpr : ga----- : 383  
1294 Alga6\_Alpr : ga----- : 384  
1295 Alga7\_Alpr : gagtgctctttcttcccctgctcgttgtgggggagcggaggataaaaact : 436  
1296 Alga8\_Alpr : ga----- : 382  
1297 Alga0\_Alpr : g----- : 438  
1298 Alha1\_Alpr : ga----- : 367  
1299 Alha2\_Alpr : ----- : -  
1300 Alha3\_Alpr : gatttaggggaaccctccctaact----- : 389  
1301 Alha6\_Alpr : gaagtggggatggtttgggtt----- : 384  
1302 Alha7\_Alpr : gatttaggggaaccctccctaagt----- : 389  
1303 Alha8\_Alpr : ga----- : 365  
1304 Alha0\_Alpr : g----- : 395  
1305 Alni1\_Alpr : ga----- : 385  
1306 Alni3\_Alpr : ga----- : 384  
1307 Alni3\_Alpr : ga----- : 385  
1308 Alni4\_Alpr : ga----- : 383  
1309 Alni6\_Alpr : gatttagcgggaaccctccctaa----- : 403  
1310 Alni7\_Alpr : agatgagcggaccctccctaatac----- : 408  
1311 Alni8\_Alpr : gatttagcgggaaccctccctaa----- : 407  
1312 Alni0\_Alpr : g----- : 455  
1313 Alof1\_Alpr : g----- : 374  
1314 Alof2\_Alpr : ga----- : 378  
1315 Alof3\_Alpr : gatttgggggaccctttgc----- : 392  
1316 Alof4\_Alpr : ga----- : 378  
1317 Alof5\_Alpr : ga----- : 376  
1318 Alof6\_Alpr : gattcggggaccctgtaccga----- : 395  
1319 Alof7\_Alpr : ga----- : 377  
1320 Alof8\_Alpr : ga----- : 376  
1321 Alof0\_Alpr : g----- : 404  
1322 Alox1\_Alpr : ga----- : 375  
1323 Alox2\_Alpr : ga----- : 375  
1324 Alox6\_Alpr : gatttagcgggaaccctccctaa----- : 394  
1325 Alox7\_Alpr : ga----- : 377  
1326 Alox0\_Alpr : g----- : 403  
1327  
1328 Alga1\_Alpr : ----- : -  
1329 Alga2\_Alpr : ----- : -

```

1330 Alga3_Alpr : ----- : -
1331 Alga4_Alpr : ----- : -
1332 Alga6_Alpr : ----- : -
1333 Alga7_Alpr : attatTTTTtTTtaataaattatccccTTTTtTTtatttc : 477
1334 Alga8_Alpr : ----- : -
1335 Alga0_Alpr : ----- : -
1336 Alha1_Alpr : ----- : -
1337 Alha2_Alpr : ----- : -
1338 Alha3_Alpr : ----- : -
1339 Alha6_Alpr : ----- : -
1340 Alha7_Alpr : ----- : -
1341 Alha8_Alpr : ----- : -
1342 Alha0_Alpr : ----- : -
1343 Alni1_Alpr : ----- : -
1344 Alni3_Alpr : ----- : -
1345 Alni3_Alpr : ----- : -
1346 Alni4_Alpr : ----- : -
1347 Alni6_Alpr : ----- : -
1348 Alni7_Alpr : ----- : -
1349 Alni8_Alpr : ----- : -
1350 Alni0_Alpr : ----- : -
1351 Aloh1_Alpr : ----- : -
1352 Aloh2_Alpr : ----- : -
1353 Aloh3_Alpr : ----- : -
1354 Aloh4_Alpr : ----- : -
1355 Aloh5_Alpr : ----- : -
1356 Aloh6_Alpr : ----- : -
1357 Aloh7_Alpr : ----- : -
1358 Aloh8_Alpr : ----- : -
1359 Aloh0_Alpr : ----- : -
1360 Alox1_Alpr : ----- : -
1361 Alox2_Alpr : ----- : -
1362 Alox6_Alpr : ----- : -
1363 Alox7_Alpr : ----- : -
1364 Alox0_Alpr : ----- : -
1365

```

1366 **Figure S15. The alignment of amplicons in 10 *Alpinia* plastomes produced by**  
 1367 **designed Alpp primers in silico.**

1368 The ID of each sequence is shown on the left side of each panel. The ID is the accession numbers of  
 1369 species in GenBank (Table S24). The rightmost number in each column represents the position of the  
 1370 base at that position in the amplicon. The SNPs and Indel are shown in red squares. The nucleotides  
 1371 identical across all plastomes are shaded in black, whereas those conserved in 60% of the  
 1372 sequences are shaded in gray.

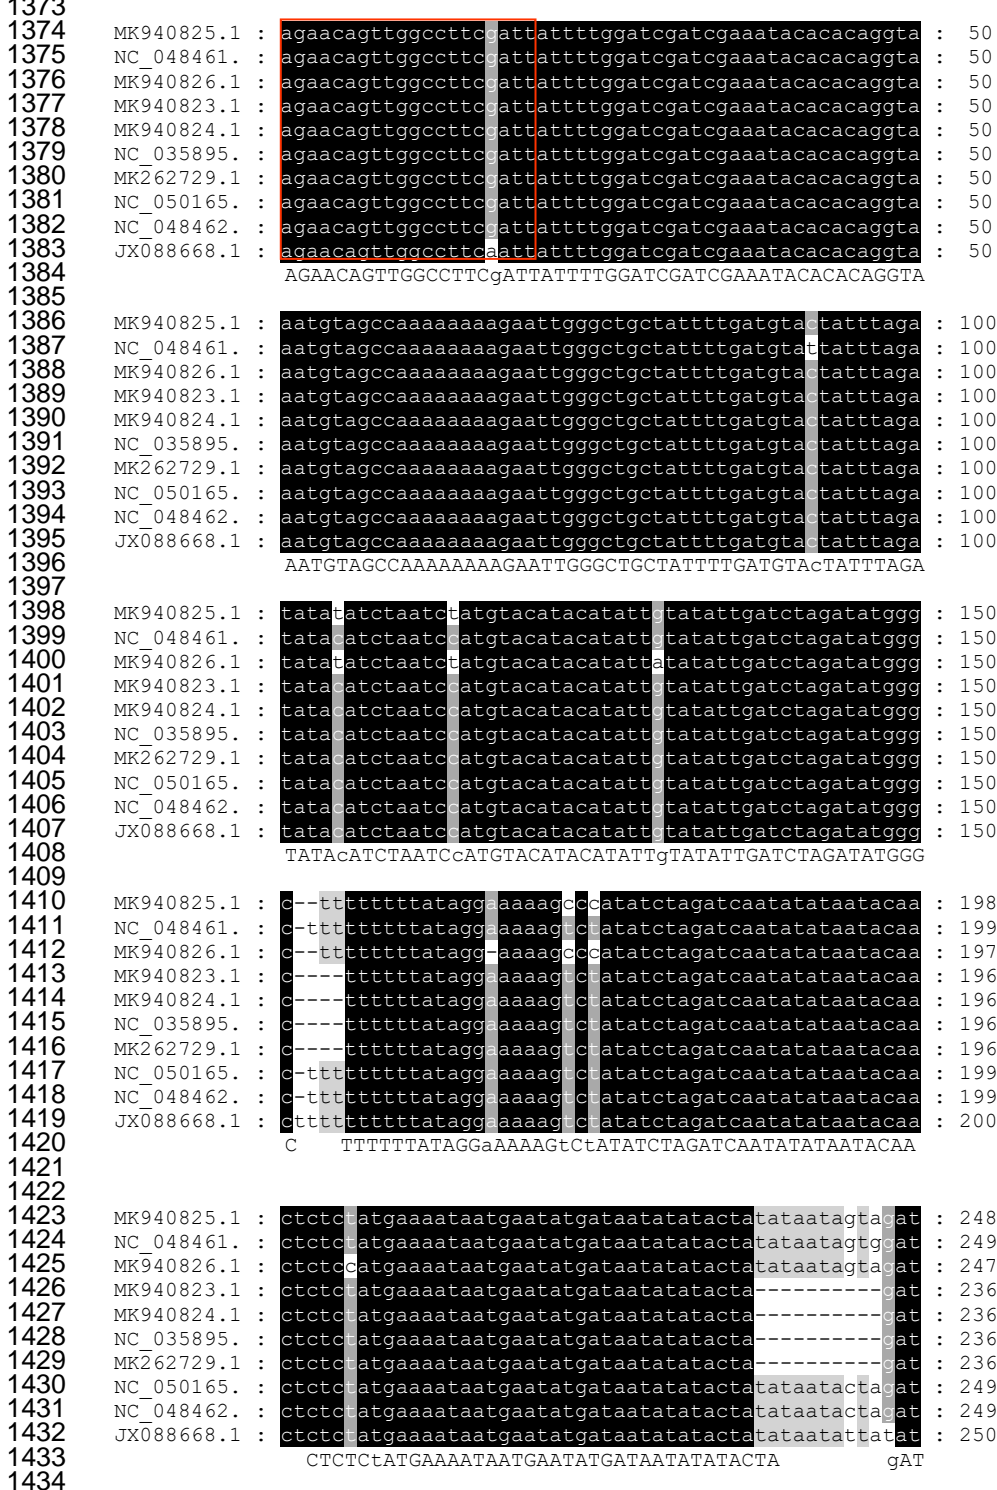



1435  
1436 MK940825.1 : aactataccatactatcaggccttagatagtagtactatctcagataccttatt : 298  
1437 NC\_048461.1 : aactataccatactatcaggccttagatagtagtactatctcagataccttatt : 299  
1438 MK940826.1 : aactataccatactatcaggccttagatagtagtactatctcagataccttatt : 297  
1439 MK940823.1 : aactataccatactatcaggccttagatagtagtactatctcagatac----- : 281  
1440 MK940824.1 : aactataccatactatcaggccttagatagtagtactatctcagatac----- : 281  
1441 NC\_035895.1 : aactataccatactatcaggccttagatagtagtactatctcagatac----- : 281  
1442 MK262729.1 : aactataccatactatcaggccttagatagtagtactatctcagatac----- : 281  
1443 NC\_050165.1 : aactataccatactatcaggccttagatagtagtactatctcagatac----- : 294  
1444 NC\_048462.1 : aactataccatactatcaggccttagatagtagtactatctcagatac----- : 294  
1445 JX088668.1 : aactataccatactatcaggccttagatagtagtactatctcagataccttatt : 300  
1446 AACTATACCATACTATCTAGGCTTAGATAGTACTATCTCAGATAC  
1447  
1448 MK940825.1 : atctcagataccttatgattccagccgatcatttctttcgtttaagactt : 348  
1449 NC\_048461.1 : atctcagataccttatgattccagccgatcatttctttcgtttaagactt : 349  
1450 MK940826.1 : atctcagataccttatgattccagccgatcatttctttcgtttaagactt : 347  
1451 MK940823.1 : -----ttatgattccagccgatcatttctttcgtttaagactt : 320  
1452 MK940824.1 : -----ttatgattccagccgatcatttctttcgtttaagactt : 320  
1453 NC\_035895.1 : -----ttatgattccagccgatcatttctttcgtttaagactt : 320  
1454 MK262729.1 : -----ttatgattccagccgatcatttctttcgtttaagactt : 320  
1455 NC\_050165.1 : -----ttatgattccagccgatcatttctttcgtttaagactt : 333  
1456 NC\_048462.1 : -----ttatgattccagccgatcatttctttcgtttaagactt : 333  
1457 JX088668.1 : atctcagataccttatgattccagccgatcatttctttcgtttaagactt : 350  
1458 TTATgATTCCAGCCaGATCATTTCTTTTCGTTTAAGACTT  
1459  
1460 MK940825.1 : aaagtttga-----cttcaatcattgataagaactaataatt : 385  
1461 NC\_048461.1 : gaagtttgaatccctttcctttcttcaatcattgataagaactaataatt : 399  
1462 MK940826.1 : gaagtttga-----cttcaatcattgataagaactaataatt : 384  
1463 MK940823.1 : gaagtttgaatccctttcctttcttcaatcattgataagaactaataatt : 370  
1464 MK940824.1 : gaagtttgaatccctttcctttcttcaatcattgataagaactaataatt : 370  
1465 NC\_035895.1 : gaagtttgaatccctttcctttcttcaatcattgataagaactaataatt : 370  
1466 MK262729.1 : gaagtttgaatccctttcctttcttcaatcattgataagaactaataatt : 370  
1467 NC\_050165.1 : gaagtttgaatccctttcctttcttcaatcattgataagaactaataatt : 383  
1468 NC\_048462.1 : gaagtttgaatccctttcctttcttcaatcattgataagaactaataatt : 383  
1469 JX088668.1 : gaagtttgaatccctttcctttcttcaatcattgataagaactaataatt : 400  
1470 gAAGTTTgAatccctttcctttCTTCAATCATTTGATAAGAACTAATAATT  
1471  
1472 MK940825.1 : caagtttcaatcaaattagtcattttgactgactggtttttacgtagatga : 435  
1473 NC\_048461.1 : caagtttcaatcaaattagtcattttgactgactggtttttacgtagatga : 449  
1474 MK940826.1 : caagtttcaatcaaattagtcattttgactgactggtttttacgtagatga : 434  
1475 MK940823.1 : caagtttcaatcaaattagtcattttgactgactggtttttacgtagatga : 420  
1476 MK940824.1 : caagtttcaatcaaattagtcattttgactgactggtttttacgtagatga : 420  
1477 NC\_035895.1 : caagtttcaatcaaattagtcattttgactgactggtttttacgtagatga : 420  
1478 MK262729.1 : caagtttcaatcaaattagtcattttgactgactggtttttacgtagatga : 420  
1479 NC\_050165.1 : caagtttcaatcaaattagtcattttgactgactggtttttacgtagatga : 433  
1480 NC\_048462.1 : caagtttcaatcaaattagtcattttgactgactggtttttacgtagatga : 433  
1481 JX088668.1 : caagtttcaatcaaattagtcattttgactgactggtttttacgtagatga : 450  
1482 CAAGTTTCAATCAAATTAGTCATTTTGACTGACTGTTTTTACGTAGATGA  
1483  
1484 MK940825.1 : taagtaaaaaagcagtaggaactagaatgaacagtgagcagt : 475  
1485 NC\_048461.1 : taagtaaaaaagcagtaggaactagaatgaacagtgagcagt : 489  
1486 MK940826.1 : taagtaaaaaagcagtaggaactagaatgaacagtgagcagt : 474  
1487 MK940823.1 : taagtaaaaaagcagtaggaactagaatgaacagtgagcagt : 460  
1488 MK940824.1 : taagtaaaaaagcagtaggaactagaatgaacagtgagcagt : 460  
1489 NC\_035895.1 : taagtaaaaaagcagtaggaactagaatgaacagtgagcagt : 460  
1490 MK262729.1 : taagtaaaaaagcagtaggaactagaatgaacagtgagcagt : 460  
1491 NC\_050165.1 : taagtaaaaaagcagtaggaactagaatgaacagtgagcagt : 473  
1492 NC\_048462.1 : taagtaaaaaagcagtaggaactagaatgaacagtgagcagt : 473  
1493 JX088668.1 : taagtaaaaaagcagtaggaactagaatgaacagtgagcagt : 490  
1494 TAAGTAAAAAAGCAGTAGGAAC TAGAATGAACAGTGACAGT

1495

1496 **Figure S16. The alignment of amplicons in 10 *Alpinia* plastomes produced by**  
 1497 **designed Alpr primers in silico.**

1498 The ID of each sequence is shown on the left side of each panel. The ID is the accession numbers of  
 1499 species in NCBI (Table S24). The rightmost number in each column represents the position of the  
 1500 base at that position in the amplicon. The SNPs and Indel are shown in red squares. The nucleotides  
 1501 identical across all plastomes are shaded in black, whereas those conserved in 60% of the  
 1502 sequences are shaded in gray.

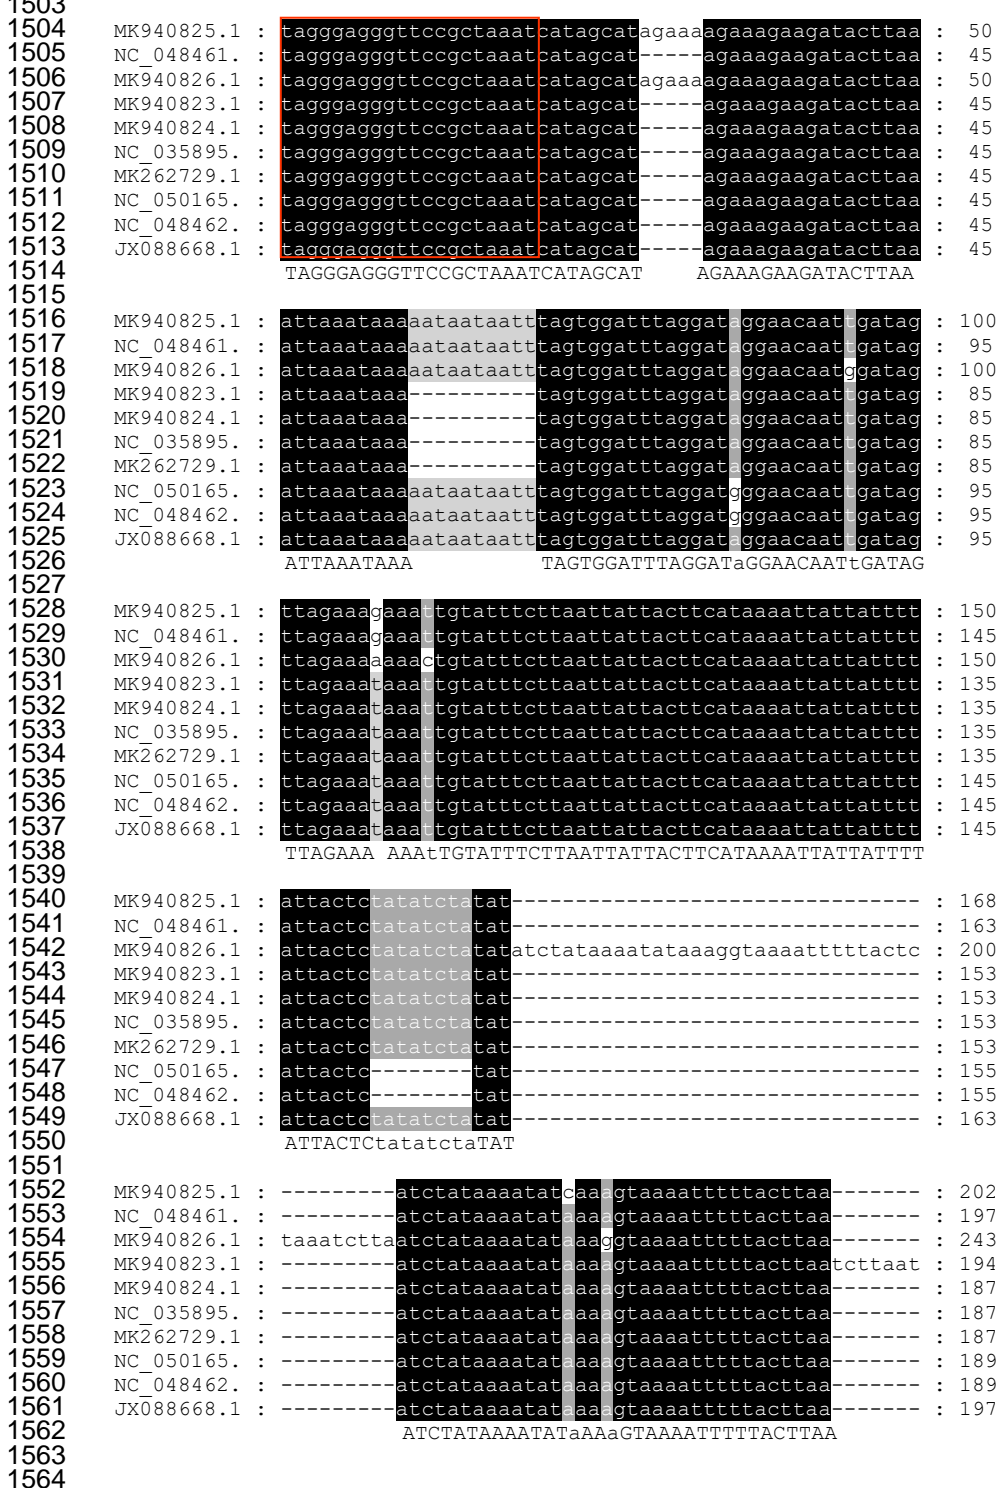

```

1565 MK940825.1 : -tcttaattacattaattttattatcttaattacattaa--ttaattatt : 249
1566 NC_048461.1 : -tctta-----attacattaa-----tatt : 216
1567 MK940826.1 : -tcttaattac-----attacattaaatattaattatt : 274
1568 MK940823.1 : tcttaattac-----attacattaa-----tatt : 219
1569 MK940824.1 : -tcttaattac-----attacattaaatattaattatt : 218
1570 NC_035895.1 : -tcttaattac-----attacattaaatattaattatt : 218
1571 MK262729.1 : -tcttaattac-----attacattaaatattaattatt : 218
1572 NC_050165.1 : -tcttaattac-----attacattaa-----tatt : 213
1573 NC_048462.1 : -tcttaattac-----attacattaa-----tatt : 213
1574 JX088668.1 : -tctta-----attacattaa-----tatt : 216
1575          TCTTAattac          ATTACATTAA          TATT
1576
1577
1578 MK940825.1 : aattagaatttaataaa--aaataagaatttaatgataatgataattg : 297
1579 NC_048461.1 : aattagaatttaataaa--aaataagaatt-----tcatgataattg : 254
1580 MK940826.1 : aattagaatttaataaa--aaataagaatt-----taatgataattg : 312
1581 MK940823.1 : aattaataatttaataaataaaataagaatt-----tcatgataattg : 263
1582 MK940824.1 : aattaataatttaataaataaaataagaatt-----tcatgataattg : 262
1583 NC_035895.1 : aattaataatttaataaataaaataagaatt-----tcatgataattg : 262
1584 MK262729.1 : aattaataatttaataaataaaataagaatt-----tcatgataattg : 262
1585 NC_050165.1 : aattaataatttaataaaataagaatt-----tcatgataattg : 251
1586 NC_048462.1 : aattaataatttaataaaataagaatt-----tcatgataattg : 251
1587 JX088668.1 : aattaataatttaataaaataagaatt-----tcatgataattg : 254
1588          AATTAaTAAATTAAT          AAATAAGAATT          TcATGATAATTG
1589
1590
1591 MK940825.1 : caacgaatttttagaaaatttatttctagttagtcacttttatttbaat : 347
1592 NC_048461.1 : caacgaatttttagaaaatttatttctagttagtcacttttatttbat : 304
1593 MK940826.1 : caacgaatttttagaaaatttatttctagttagtcacttttatttbaat : 362
1594 MK940823.1 : caacgaatttttagaaaatttatttctagttagtcacttttatttbat : 313
1595 MK940824.1 : caacgaatttttagaaaatttatttctagttagtcacttttatttbat : 312
1596 NC_035895.1 : caacgaatttttagaaaatttatttctagttagtcacttttatttbat : 312
1597 MK262729.1 : caacgaatttttagaaaatttatttctagttagtcacttttatttbat : 312
1598 NC_050165.1 : caacgaatttttagaaaatttatttctagttagtcacttttatttbat : 301
1599 NC_048462.1 : caacgaatttttagaaaatttatttctagttagtcacttttatttbat : 301
1600 JX088668.1 : caacgaatttttagaaaatttatttctagttagtcacttttatttbat : 304
1601          CAACGAATTTTAgAAAATTCATTTCTAGTTAGTCACITTTTATTTcAT
1602
1603
1604 MK940825.1 : ttatttttgtttcttcttctttagctcagatcgaaaatataagagttaa : 397
1605 NC_048461.1 : ttatttttgtttcttcttctttagctcagatcgaaaatataagagttaa : 354
1606 MK940826.1 : ttatttttgtttcttcttctttagctcagatcgaaaatataagagttaa : 412
1607 MK940823.1 : ttatttttgtttcttcttctttagctcagatcgaaaatataagagttaa : 363
1608 MK940824.1 : ttatttttgtttcttcttctttagctcagatcgaaaatataagagttaa : 362
1609 NC_035895.1 : ttatttttgtttcttcttctttagctcagatcgaaaatataagagttaa : 362
1610 MK262729.1 : ttatttttgtttcttcttctttagctcagatcgaaaatataagagttaa : 362
1611 NC_050165.1 : ttatttttgtttcttcttctttagctcagatcgaaaatataagagttaa : 351
1612 NC_048462.1 : ttatttttgtttcttcttctttagctcagatcgaaaatataagagttaa : 351
1613 JX088668.1 : ttatttttgtttcttcttctttagctcagatcgaaaatataagagttaa : 354
1614          TTATTTTGTGTTTCTTCTTCTTcAGCTCAGATCGAAAATATAAGAGTTAA
1615
1616
1617 MK940825.1 : gccgatacaaaaat--gaaagggggtttatggctaagggttaag : 438
1618 NC_048461.1 : gccgatacaaaaat--taaagggggtttatggctaagggttaag : 395
1619 MK940826.1 : gccgatacaaaaataaaagggggtttatggctaagggttaag : 455
1620 MK940823.1 : gccgatacaaaaat--taaagggggtttatggctaagggttaag : 404
1621 MK940824.1 : gccgatacaaaaat--taaagggggtttatggctaagggttaag : 403
1622 NC_035895.1 : gccgatacaaaaat--taaagggggtttatggctaagggttaag : 403
1623 MK262729.1 : gccgatacaaaaat--taaagggggtttatggctaagggttaag : 403
1624 NC_050165.1 : gccgatacaaaaat--taaagggggtttatggctaagggttaag : 392
1625 NC_048462.1 : gccgatacaaaaat--taaagggggtttatggctaagggttaag : 392
1626 JX088668.1 : gccgatacaaaaat--taaagggggtttatggctaagggttaag : 395
1627          GCCGATACAAAAT t AAAGGGGGTTTATGGCTAAGGGTAAG

```
